# Supplementary material for: Comparative genomic and proteomic analyses of PE/PPE multigene family of Mycobacterium tuberculosis H37Rv and H37Ra reveal novel and interesting differences with implications in virulence
Source: PubMed Central journal article supplement — Nucleic Acids Res. 2012 May 22;40(15):7113–22. doi: 10.1093/nar/gks465 (PMC3424577; doi:10.1093/nar/gks465), 2012-05-22

## SUPPLEMENTARY TABLE AND FIGURE LEGENDS

### Table S1

Members of PE/PPE, and non-PE/PPE family found to be exactly similar and different between H<sub>37</sub>Rv and H<sub>37</sub>Ra strains of *Mycobacterium tuberculosis*. Members with \* superscript are not annotated in H<sub>37</sub>Ra, while members with # superscript have been discontinued in NCBI database.

### Table S2

List of PE/PPE proteins showing differences between H<sub>37</sub>Rv and H<sub>37</sub>Ra strains of *Mycobacterium tuberculosis*.

### Table S3

Instability index, Aliphatic index and Gravy values of members of PE/PPE, and non-PE/PPE family found to be different between H<sub>37</sub>Rv and H<sub>37</sub>Ra strains of *Mycobacterium tuberculosis*

### Figure S1

Gain or loss of globular domain as a function of variation between H<sub>37</sub>Rv and H<sub>37</sub>Ra as measured by GlobPlot analyses. Disorder propensity of the protein stretch is calculated by GlobPlot analyses to identify the globular domain which are shown in pink. Sequence alignment above the figure illustrates the amino acid sequence differences between H<sub>37</sub>Rv and H<sub>37</sub>Ra.

**A:** N-terminal extension in MRA\_0313 leads to an additional globular domain.

**B:** N-terminal deletion in MRA\_2113 leads to loss of globular domain.

**C:** Insertion in MRA\_1102 leads to an additional globular domain.

**D:** MRA\_3635 showed similarity to Rv3595c in the length and sequence of the globular domain.

**E:** MRA\_3634 has a single globular domain which is different in sequence when compared with Rv3595c.

**F:** N-terminal extension in MRA\_1156 leads to extension in already existing globular domain.

**G:** Insertions and substitutions in MRA\_3950 result in extension of globular domain.

**H:** A single amino acid change of serine in H<sub>37</sub>Rv to lysine in H<sub>37</sub>Ra in PhoP (MRA\_0767) had no effect on globular domain profile when compared to Rv0757.

## Figure S2

Nucleotide variations between H<sub>37</sub>Rv and H<sub>37</sub>Ra result in gain, loss or both gain and loss of serine/threonine phosphorylation sites in the different proteins. The predictive phosphorylation site(s) in proteins is represented by blue circle (in the case of H<sub>37</sub>Rv) or red dots (in case of H<sub>37</sub>Ra). Overlap of blue and red circle indicates no gain or loss of phosphorylation sites in H<sub>37</sub>Rv and H<sub>37</sub>Ra proteins. Horizontal line represents the cutoff (threshold) above which it is considered as a putative phosphorylation site. The actual sequence of amino acids and the potential phosphorylation site (highlighted in red) is shown above the respective figures.

- A:** Deletion in MRA\_0265 leads to loss of two serine phosphorylation site.
- B:** N-terminal deletion in MRA\_0295 leads to loss of two serine phosphorylation sites.
- C:** N-terminal deletion in MRA\_0763 leads to loss of one serine phosphorylation site.
- D:** N-terminal extension in MRA\_0313 leads to gain of one threonine and three serine phosphorylation sites.
- E:** Insertion in MRA\_2767 leads to gain of two serine phosphorylation sites.
- F:** N-terminal extension in MRA\_1205 leads to gain of one serine phosphorylation site.
- G:** Deletion and substitutions in MRA\_1102 lead to gain of four and loss of two serine phosphorylation sites.
- H:** Deletion in MRA\_3428 leads to loss of one threonine phosphorylation site.
- I:** Deletion in MRA\_2113 leads to loss of one serine phosphorylation site.
- J:** Substitution in MRA\_0363 leads to gain of one serine phosphorylation site.
- K:** InDels and substitutions in MRA\_1772 lead to loss of two and gain of one serine phosphorylation sites.
- L:** Deletion in MRA\_3553 leads to loss of two serine phosphorylation sites.
- M:** Substitutions in MRA\_0288 lead to loss three serine phosphorylation sites.
- N:** Substitution in MRA\_0755 leads to a loss of one serine phosphorylation site.
- O:** Deletion in MRA\_3384 leads to a loss of two threonine and thirteen serine phosphorylation sites.
- P:** Insertions and substitutions in MRA\_0395 lead to loss of one and gain of three serine phosphorylation sites.
- Q:** Insertions and substitutions in MRA\_0885 lead to gain of one and loss of one serine phosphorylation site.
- R:** Substitutions and deletions in MRA\_1205A lead to gain of two and loss of two serine phosphorylation site positions.
- S:** Substitutions in MRA\_3635 lead to gain of one serine and one threonine phosphorylation site.
- T:** Substitutions and deletions in MRA\_3634 lead to loss of two and gain of seven serine phosphorylation sites.
- U:** PhoP in H<sub>37</sub>Ra (MRA\_0767) has a single substitution which does not alter the number of Ser/Thr phosphorylation sites.

V: Substitutions in MRA\_3950, SigM in H<sub>37</sub>Ra result in gain of one and loss of two serine phosphorylation sites.

W: Mmpl13b in H<sub>37</sub>Ra (MRA\_1156) has an N-terminal extension which leads to gain of one serine phosphorylation site.

Table S1: Members of PE/PPE, and non-PE/PPE family found to be exactly similar and different between H<sub>37</sub>Rv and H<sub>37</sub>Ra strains of Mycobacterium tuberculosis

| S. no. | Family | Members with no difference between H <sub>37</sub> Rv and H <sub>37</sub> Ra |                    |                   |                        | Members different between H <sub>37</sub> Rv and H <sub>37</sub> Ra |                        |
|--------|--------|------------------------------------------------------------------------------|--------------------|-------------------|------------------------|---------------------------------------------------------------------|------------------------|
| 1      | PE/PPE | Rv0096<br>(PPE1)                                                             | Rv2892c<br>(PPE45) | Rv1386<br>(PE15)  | Rv1651c<br>(PE_PGRS30) | Rv0109<br>(PE_PGRS1)                                                | Rv1450c<br>(PE_PGRS27) |
|        |        | Rv0280<br>(PPE3)                                                             | Rv3018c<br>(PPE46) | Rv1430<br>(PE16)  | Rv1768<br>(PE_PGRS31)  | Rv0124<br>(PE_PGRS2)                                                | Rv1759c<br>(wag22)     |
|        |        | Rv0305c<br>(PPE6)                                                            | Rv3125c<br>(PPE49) | Rv1646<br>(PE17)  | Rv1818c<br>(PE_PGRS33) | Rv0256c<br>(PPE2)                                                   | Rv1787<br>(PPE25)      |
|        |        | Rv0755c<br>(PPE12)                                                           | Rv3135<br>(PPE50)  | Rv1788<br>(PE18)  | Rv1840c<br>(PE_PGRS34) | Rv0278c<br>(PE_PGRS3)                                               | Rv1803c<br>(PE_PGRS32) |
|        |        | Rv0915c<br>(PPE14)                                                           | Rv3136<br>(PPE51)  | Rv1791<br>(PE19)  | Rv1983<br>(PE_PGRS35)  | Rv0279c<br>(PE_PGRS4)                                               | Rv1807<br>(PPE31)      |
|        |        | Rv1039c<br>(PPE15)                                                           | Rv3159c<br>(PPE53) | Rv1806<br>(PE20)  | Rv2162c<br>(PE_PGRS38) | Rv0286<br>(PPE4)                                                    | Rv1808<br>(PPE32)      |
|        |        | Rv1135c<br>(PPE16)                                                           | Rv3425<br>(PPE57)  | Rv2107<br>(PE22)  | Rv2340c<br>(PE_PGRS39) | Rv0304c<br>(PPE5)                                                   | Rv1809<br>(PPE33)      |
|        |        | Rv1168c<br>(PPE17)                                                           | Rv3426<br>(PPE58)  | Rv2328<br>(PE23)  | Rv2487c<br>(PE_PGRS42) | Rv0354c<br>(PPE7)                                                   | Rv2098c<br>(PE_PGRS36) |
|        |        | Rv1361c<br>(PPE19)                                                           | Rv3429<br>(PPE59)  | Rv2431c<br>(PE25) | Rv2490c<br>(PE_PGRS43) | Rv0355c<br>(PPE8)                                                   | Rv2126c<br>(PE_PGRS37) |
|        |        | Rv1387<br>(PPE20)                                                            | Rv3478<br>(PPE60)  | Rv2519<br>(PE26)  | Rv2615c<br>(PE_PGRS45) | Rv0387c<br>(PPE9)                                                   | Rv2371<br>(PE_PGRS40)  |
|        |        |                                                                              |                    | Rv0388c<br>(PPE9) | Rv2396<br>(PE_PGRS41)  |                                                                     |                        |

|  |  |                    |                    |                        |                         |                        |                                  |
|--|--|--------------------|--------------------|------------------------|-------------------------|------------------------|----------------------------------|
|  |  | Rv1548c<br>(PPE21) | Rv3532<br>(PPE61)  | Rv2769c<br>(PE27)      | Rv3345c<br>(PE_PGRS50)  | Rv0442c<br>(PPE10)     | Rv2408<br>(PE24)                 |
|  |  | Rv1705c<br>(PPE22) | Rv3533c<br>(PPE62) | Rv3020c<br>(esxS)      | Rv3507<br>(PE_PGRS53)   | Rv0453<br>(PPE11)      | Rv2591<br>(PE_PGRS44)            |
|  |  | Rv1706c<br>(PPE23) | Rv3539<br>(PPE63)  | Rv3022A<br>(PE29)      | Rv3511<br>(PE_PGRS55)   | Rv0532<br>(PE_PGRS6)   | Rv2634c<br>(PE_PGRS46)           |
|  |  | Rv1753c<br>(PPE24) | Rv3558<br>(PPE64)  | Rv3477<br>(PE31)       | Rv3590c<br>(PE_PGRS58)  | Rv0578c<br>(PE_PGRS7)  | Rv2741<br>(PE_PGRS47)            |
|  |  | Rv1789<br>(PPE26)  | Rv3621c<br>(PPE65) | Rv3622c<br>(PE32)      | Rv3812<br>(PE_PGRS62)   | Rv0742<br>(PE_PGRS8)   | Rv2853<br>(PE_PGRS48)            |
|  |  | Rv1790<br>(PPE27)  | Rv3738c<br>(PPE66) | Rv3650<br>PE33         | Rv3097c<br>(lipY)       | Rv0746<br>(PE_PGRS9)   | Rv3021c/Rv3022c<br>(PPE47/PPE48) |
|  |  | Rv1800<br>(PPE28)  | Rv3739c<br>(PPE68) | Rv3746c<br>(PE34)      | Rv3822                  | Rv0747<br>(PE_PGRS10)  | Rv3144c<br>(PPE52)               |
|  |  | Rv1801<br>(PPE29)  | Rv3873<br>(PPE68)  | Rv3872<br>(PE35)       | Rv0287<br>(esxG)        | Rv0754<br>(PE_PGRS11)  | Rv3343c<br>(PPE54)               |
|  |  | Rv1802<br>(PPE30)  | Rv3892c<br>(PPE69) | Rv3893c<br>(PE36)      | Rv0378                  | Rv0833<br>(PE_PGRS13)  | Rv3347c<br>(PPE55)               |
|  |  | Rv1917c<br>(PPE34) | Rv0151c<br>(PE1)   | Rv0297<br>(PE_PGRS5)   | Rv1089*<br>(PE10)       | Rv0878c<br>(PPE13)     | Rv3350c<br>(PPE56)               |
|  |  | Rv1918c<br>(PPE35) | Rv0152c<br>(PE2)   | Rv0832<br>(PE_PGRS12)  | Rv3344c*<br>(PE_PGRS49) | Rv0977<br>(PE_PGRS16)  | Rv3367<br>(PE_PGRS51)            |
|  |  | Rv2108<br>(PPE36)  | Rv0159c<br>(PE3)   | Rv0834c<br>(PE_PGRS14) | Rv3512*<br>(PE_PGRS56)  | Rv0978c<br>(PE_PGRS17) | Rv3388<br>(PE_PGRS52)            |
|  |  | Rv2123<br>(PPE37)  | Rv0160c<br>(PE4)   | Rv0872c<br>(PE_PGRS15) | Rv3652*<br>(PE_PGRS60)  | Rv1068c<br>(PE_PGRS20) | Rv3507<br>(PE_PGRS53)            |
|  |  | Rv2352c<br>(PPE38) | Rv0285<br>(PE5)    | Rv0980c<br>(PE_PGRS18) | Rvnp02 <sup>#</sup>     | Rv1088<br>(PE9)        | Rv3508<br>(PE_PGRS54)            |
|  |  | Rv2353c<br>(PPE39) | Rv0335c<br>(PE6)   | Rv1067c<br>(PE_PGRS19) | Rvnp03 <sup>#</sup>     | Rv1091<br>(PE_PGRS22)  | Rv3511<br>(PE_PGRS55)            |

|   |      |                    |                   |                        |                                 |                        |                        |
|---|------|--------------------|-------------------|------------------------|---------------------------------|------------------------|------------------------|
|   |      | Rv2356c<br>(PPE40) | Rv0916c<br>(PE7)  | Rv1087<br>(PE_PGRS21)  | Rv2099c <sup>#</sup><br>(PE21)  | Rv1195<br>(PE13)       | Rv3514<br>(PE_PGRS57)  |
|   |      | Rv2430c<br>(PPE41) | Rv1040c<br>(PE8)  | Rv1243c<br>(PE_PGRS23) | Rv3018A <sup>#</sup><br>(PE27A) | Rv1196<br>(PPE18)      | Rv3595c<br>(PE_PGRS59) |
|   |      | Rv2608<br>(PPE42)  | Rv1169c<br>(PE11) | Rv1325c<br>(PE_PGRS24) |                                 | Rv1396c<br>(PE_PGRS25) | Rv3653<br>(PE_PGRS61)  |
|   |      | Rv2768c<br>(PPE43) | Rv1172c<br>(PE12) | Rv1452c<br>(PE_PGRS28) |                                 | Rv1441c<br>(PE_PGRS26) |                        |
|   |      | Rv2770c<br>(PPE44) | Rv1214c<br>(PE14) | Rv1468c<br>(PE_PGRS29) |                                 |                        |                        |
| 2 | MCE  | Rv0165c            | Rv0586            | Rv1963c                | Rv3495c                         |                        |                        |
|   |      | Rv0166             | Rv0587            | Rv1964                 | Rv3496c                         |                        |                        |
|   |      | Rv0167             | Rv0588            | Rv1965                 | Rv3497c                         |                        |                        |
|   |      | Rv0168             | Rv0589            | Rv1966                 | Rv3498c                         |                        |                        |
|   |      | Rv0169             | Rv0590            | Rv1967                 | Rv3499c                         |                        |                        |
|   |      | Rv0170             | Rv0590A           | Rv1968                 | Rv3500c                         |                        |                        |
|   |      | Rv0171             | Rv0591            | Rv1969                 | Rv3501c                         |                        |                        |
|   |      | Rv0172             | Rv0592            | Rv1970                 |                                 |                        |                        |
|   |      | Rv0173             | Rv0593            | Rv1971                 |                                 |                        |                        |
|   |      | Rv0174             | Rv0594            | Rv3494c                |                                 |                        |                        |
| 3 | Mmpl | Rv0202c            | Rv0507            | Rv1522c                | Rv2942                          | Rv1146                 |                        |
|   |      | Rv0206c            | Rv0676c           | Rv1557                 | Rv3823c                         |                        |                        |
|   |      | Rv0402c            | Rv1145            | Rv2339                 |                                 |                        |                        |
|   |      | Rv0450c            | Rv1183            |                        |                                 |                        |                        |

|   |               |         |         |         |         |        |
|---|---------------|---------|---------|---------|---------|--------|
| 4 | Sigma factors | Rv0182c | Rv1189  | Rv2703  | Rv3286c | Rv3911 |
|   |               | Rv0445c | Rv1221  | Rv2710  | Rv3328c |        |
|   |               | Rv0735  | Rv2069  | Rv3223c | Rv3414c |        |
| 5 | TCCSs         | Rv0260c | Rv0844c | Rv1032c | Rv3220c | Rv0757 |
|   |               | Rv0490  | Rv0845  | Rv1033c | Rv3245c |        |
|   |               | Rv0491  | Rv0902c | Rv1626  | Rv3246c |        |
|   |               | Rv0600c | Rv0903c | Rv2027c | Rv3764c |        |
|   |               | Rv0601c | Rv0981  | Rv2884  | Rv3765c |        |
|   |               | Rv0602c | Rv0982  | Rv3132c |         |        |
|   |               | Rv0758  | Rv1027c | Rv3133c |         |        |
|   |               | Rv0818  | Rv1028c | Rv3143  |         |        |

Table S2: List of PPE, PE and PE\_PGRS proteins showing differences between H<sub>37</sub>Rv and H<sub>37</sub>Ra strains of Mycobacterium tuberculosis:

| H <sub>37</sub> Rv gene product | H <sub>37</sub> Rv gene locus | H <sub>37</sub> Ra gene locus | Genetic Variations in H <sub>37</sub> Ra | Amino acid length in H <sub>37</sub> Rv/H <sub>37</sub> Ra | Protein Product Variation in H <sub>37</sub> Ra |
|---------------------------------|-------------------------------|-------------------------------|------------------------------------------|------------------------------------------------------------|-------------------------------------------------|
| PPE2                            | Rv0256c                       | MRA_0265                      | Deletion                                 | 556/520                                                    | N-terminal shortened                            |
| PPE4                            | Rv0286                        | MRA_0295                      | Deletion                                 | 513/497                                                    | N-terminal shortened                            |
| PPE5                            | Rv0304c                       | MRA_0313                      | Insertion                                | 2204/2373                                                  | N-terminal extended                             |
| PPE11                           | Rv0453                        | MRA_0458                      | Deletion                                 | 518/511                                                    | N-terminal shortened                            |
| PPE25                           | Rv1787                        | MRA_1801                      | Insertion                                | 365/405                                                    | N-terminal extended, substitution               |
| PPE31                           | Rv1807                        | MRA_1819                      | Insertion                                | 399/403                                                    | N-terminal extended                             |
| PPE55                           | Rv3347c                       | MRA_3387                      | Deletion                                 | 3157/3145                                                  | N-terminal shortened                            |
| PE9                             | Rv1088                        | MRA_1099                      | Insertion                                | 144/150                                                    | N-terminal extended                             |
| PE13                            | Rv1195                        | MRA_1205                      | Insertion                                | 99/115                                                     | N-terminal extended, substitution               |
| PE24                            | Rv2408                        | MRA_2433                      | Insertion                                | 239/324                                                    | N-terminal extended, substitution               |
| PE_PGRS8                        | Rv0742                        | MRA_0751                      | Deletion                                 | 175/172                                                    | N-terminal shortened, substitution              |
| PE_PGRS11                       | Rv0754                        | MRA_0763                      | Deletion                                 | 584/581                                                    | N-terminal shortened, substitution              |
| PE_PGRS25                       | Rv1396c                       | MRA_1405                      | Insertion                                | 576/597                                                    | N-terminal extended                             |
| PE_PGRS26                       | Rv1441c                       | MRA_1449                      | Deletion                                 | 491/487                                                    | N-terminal shortened                            |
| PE_PGRS32                       | Rv1803c                       | MRA_1816                      | Insertion                                | 639/650                                                    | N-terminal extended, substitution               |
| PE_PGRS40                       | Rv2371                        | MRA_2394                      | Insertion                                | 62/95                                                      | N-terminal extended                             |
| PE_PGRS44                       | Rv2591                        | MRA_2620                      | Insertion                                | 543/553                                                    | N-terminal extended                             |
| PE_PGRS46                       | Rv2634c                       | MRA_2663                      | Deletion                                 | 778/766                                                    | N-terminal shortened                            |
| PE_PGRS48                       | Rv2853                        | MRA_2876                      | Deletion                                 | 615/614                                                    | N-terminal shortened, substitution              |
| PE_PGRS61                       | Rv3653                        | MRA_3688                      | Insertion                                | 195/242                                                    | N-terminal extended, substitution               |
| Rv0387c                         | Rv0387c                       | MRA_0395                      | Insertion                                | 244/443                                                    | N-terminal extended, substitution               |
| PPE7                            | Rv0354c                       | MRA_0363                      | insertions                               | 141/185                                                    | Insertions ,deletions and substitutions         |
| PPE8                            | Rv0355c                       | MRA_0364                      | SNV                                      | 3300/3300                                                  | Substitution                                    |
| PPE9                            | Rv0388c                       | MRA_0395                      | Insertions and SNV                       | 180/443                                                    | Insertions , deletions and substitutions        |

|                 |                     |           |                              |           |                                            |
|-----------------|---------------------|-----------|------------------------------|-----------|--------------------------------------------|
| PPE10           | Rv0442c             | MRA_0447  | SNV                          | 487/487   | Substitution                               |
| PPE13           | Rv0878c             | MRA_0885  | SNV                          | 443/448   | C-terminal extended                        |
| PPE18           | Rv1196              | MRA_1205A | SNV                          | 391/339   | Insertions and deletions                   |
| PPE32           | Rv1808              | MRA_1820  | SNV                          | 409/409   | No change                                  |
| PPE33           | Rv1809              | MRA_1821  | SNV                          | 468/468   | No change                                  |
| PPE47/<br>PPE48 | Rv3021c/<br>Rv3022c | MRA_3052  | SNVs                         | 435/435   | Substitution                               |
| PPE52           | Rv3144c             | MRA_3177  | SNV                          | 409/409   | Substitution                               |
| PPE54           | Rv3343c             | MRA_3384  | SNV, Deletions,<br>insertion | 2523/1947 | Deletion in mid                            |
| PPE56           | Rv3350c             | MRA_3390  | Insertion                    | 3716/3674 | N-terminal shortened, substitution         |
| PE_PGRS1        | Rv0109              | MRA_0115  | SNV                          | 496/496   | Substitution                               |
| PE_PGRS2        | Rv0124              | MRA_0131  | SNV                          | 487/487   | Substitution                               |
| PE_PGRS3        | Rv0278c             | MRA_0287  | SNV                          | 957/957   | Substitution                               |
| PE_PGRS4        | Rv0279c             | MRA_0288  | SNVs                         | 837/837   | Substitutions                              |
| PE_PGRS6        | Rv0532              | MRA_0539  | SNVs                         | 594/594   | Substitutions                              |
| PE_PGRS7        | Rv0578c             | MRA_0585  | SNVs                         | 1306/1306 | Substitutions                              |
| PE_PGRS9        | Rv0746              | MRA_0754  | SNVs                         | 783/783   | Substitutions                              |
| PE_PGRS10       | Rv0747              | MRA_0755  | SNVs                         | 801/801   | Substitutions                              |
| PE_PGRS13       | Rv0833              | MRA_0841a | SNVs                         | 749/749   | Substitutions                              |
| PE_PGRS16       | Rv0977              | MRA_0984  | SNVs                         | 923/923   | Substitutions                              |
| PE_PGRS17       | Rv0978              | MRA_0985  | SNVs                         | 331/331   | No change                                  |
| PE_PGRS20       | Rv1068c             | MRA_1078  | SNVs                         | 463/463   | Substitution                               |
| PE_PGRS22       | Rv1091              | MRA_1102  | SNV, insertion               | 853/579   | C-terminal shortened                       |
| PE_PGRS27       | Rv1450c             | MRA_1459  | SNVs                         | 1329/1398 | Insertions                                 |
| PE_PGRS36       | Rv2098c             | MRA_2113  | Insertions                   | 491/349   | Insertions ,deletions and<br>substitutions |
| PE_PGRS37       | Rv2126c             | MRA_2140A | SNV                          | 256/256   | No change                                  |
| PE_PGRS41       | Rv2396              | MRA_2420  | SNV                          | 361/361   | Substitutions                              |
| PE_PGRS47       | Rv2741              | MRA_2767  | SNV, insertion               | 525/559   | N-terminal extended ,<br>Substitution      |



|           |         |          |                             |           |                                     |
|-----------|---------|----------|-----------------------------|-----------|-------------------------------------|
| PE_PGRS51 | Rv3367  | MRA_3407 | SNV, Insertion              | 588/591   | Insertions                          |
| PE_PGRS52 | Rv3388  | MRA_3428 | SNV, Insertion,<br>deletion | 731/582   | Insertions, deletions substitutions |
| PE_PGRS53 | Rv3507  | MRA_3547 | SNV                         | 1381/1381 | Substitution                        |
| PE_PGRS54 | Rv3508  | MRA_3548 | SNV, Insertion,<br>deletion | 1901/1545 | Insertions, deletions substitutions |
| PE_PGRS55 | Rv3511  | MRA_3551 | SNV, insertion              | 714/717   | Insertions, substitutions           |
| PE_PGRS57 | Rv3514  | MRA_3553 | SNV, Insertion,<br>deletion | 1489/1211 | Insertions, deletions substitutions |
| PE_PGRS59 | Rv3595c | MRA_3634 | Deletion                    | 439/232   | Insertions, deletions substitutions |
|           |         | MRA_3635 |                             | 439/238   | Substitutions, deletion             |
| Wag22     | Rv1759c | MRA_1772 | insertion                   | 914/156   | 5' insertion, 3' deletion           |

Table S3: Instability index, aliphatic index and Gravy values of members of PE/PPE, and non-PE/PPE family found to be different between H<sub>37</sub>Rv and H<sub>37</sub>Ra strains of Mycobacterium tuberculosis.

| Gene name | H37Rv gene locus | H37Ra gene locus | Instability index |       | Aliphatic index |        | GRAVY values |        |
|-----------|------------------|------------------|-------------------|-------|-----------------|--------|--------------|--------|
|           |                  |                  | H37Rv             | H37Ra | H37Rv           | H37Ra  | H37Rv        | H37Ra  |
| PPE2      | Rv0256c          | MRA_0265         | 43.73             | 43.29 | 86.62           | 86.23  | 0.191        | 0.187  |
| PPE4      | Rv0286           | MRA_0295         | 37.75             | 35.66 | 86.69           | 86.52  | 0.284        | 0.278  |
| PPE5      | Rv0304c          | MRA_0313         | 8.86              | 10.11 | 80.62           | 82.31  | 0.169        | 0.198  |
| PPE11     | Rv0453           | MRA_0458         | 39.9              | 39.9  | 85.41           | 84.85  | 0.167        | 0.15   |
| PPE25     | Rv1787           | MRA_1801         | 31.72             | 34.76 | 84.49           | 81.46  | 0.337        | 0.257  |
| PPE31     | Rv1807           | MRA_1819         | 40.5              | 39.22 | 84.76           | 83.95  | 0.4          | 0.286  |
| PPE7      | Rv0354c          | MRA_0363         | 22.85             | 13.86 | 61.63           | 69.62  | 0.17         | 0.155  |
| PPE9      | Rv0388c          | MRA_0395         | 40.69             | 45.5  | 75.22           | 84.09  | -0.007       | 0.261  |
|           | Rv0387c          |                  | 56.31             |       | 88.69           |        | 0.3          |        |
| PPE10     | Rv0442c          | MRA_0447         | 29.94             | 29.94 | 75.59           | 75.59  | 0.062        | 0.062  |
| PPE8      | Rv0355c          | MRA_0364         | 14.28             | 14.24 | 72.43           | 72.93  | -0.004       | -0.003 |
| PPE13     | Rv0878c          | MRA_0885         | 19.33             | 20.65 | 74.7            | 74.73  | 0.023        | -0.017 |
| PPE18     | Rv1196           | MRA_1205A        | 22.04             | 23.29 | 64.95           | 65.19  | 0.161        | 0.158  |
| PPE47     | Rv3021c          | MRA_3052         | 26.18             | 25.5  | 112.94          | 112.71 | 0.881        | 0.881  |
| PPE52     | Rv3144c          | MRA_3177         | 33.62             | 34.22 | 78.83           | 78.83  | 0.253        | 0.254  |
| PPE54     | Rv3343c          | MRA_3384         | 22.94             | 24.79 | 95.81           | 96.87  | 0.419        | 0.43   |
| PPE55     | Rv3347c          | MRA_3387         | 18.34             | 18.07 | 91.34           | 91.25  | 0.323        | 0.323  |
| PPE56     | Rv3350c          | MRA_3390         | 14.55             | 14.11 | 92.33           | 92.66  | 0.348        | 0.345  |

|           |         |          |       |       |        |       |        |        |
|-----------|---------|----------|-------|-------|--------|-------|--------|--------|
| PE9       | Rv1088  | MRA_1099 | 64.3  | 62.28 | 70.76  | 70.75 | -0.283 | -0.295 |
| PE13      | Rv1195  | MRA_1205 | 41.93 | 39.63 | 82.42  | 90.35 | 0.593  | 0.627  |
| PE24      | Rv2408  | MRA_2433 | 34.42 | 40.4  | 95.31  | 83.89 | 0.07   | -0.163 |
| PE_PGRS8  | Rv0742  | MRA_0751 | 18.29 | 15.88 | 90.4   | 90.29 | 0.668  | 0.644  |
| PE_PGRS11 | Rv0754  | MRA_0763 | 22.13 | 21.43 | 94.9   | 94.89 | 0.399  | 0.39   |
| PE_PGRS25 | Rv1396c | MRA_1405 | 15.74 | 15.48 | 53.45  | 55.33 | -0.085 | -0.051 |
| PE_PGRS26 | Rv1441c | MRA_1449 | 20    | 19.18 | 50.43  | 50.25 | -0.093 | -0.098 |
| PE_PGRS32 | Rv1803c | MRA_1816 | 17    | 18.1  | 54.71  | 54.23 | -0.122 | -0.146 |
| PE_PGRS40 | Rv2371  | MRA_2394 | 24.41 | 31.63 | 113.61 | 92.53 | 0.808  | 0.325  |
| PE_PGRS44 | Rv2591  | MRA_2620 | 22.04 | 23.39 | 64.95  | 65.19 | 0.161  | 0.158  |
| PE_PGRS46 | Rv2634c | MRA_2663 | 17.15 | 16.21 | 56.89  | 55.74 | 0.074  | 0.051  |
| PE_PGRS48 | Rv2853  | MRA_2876 | 15.91 | 16.3  | 55.04  | 54.5  | -0.089 | -0.095 |
| PE_PGRS51 | Rv3367  | MRA_3407 | 16.65 | 16.43 | 52.55  | 52.28 | -0.202 | -0.208 |
| PE_PGRS52 | Rv3388  | MRA_3428 | 12.15 | 12.05 | 51.42  | 55.27 | -0.076 | -0.001 |
| PE_PGRS53 | Rv3507  | MRA_3547 | 10.81 | 10.9  | 37.22  | 37.22 | -0.289 | -0.289 |
| PE_PGRS54 | Rv3508  | MRA_3548 | 14.71 | 16.07 | 43.01  | 45.48 | -0.126 | -0.071 |
| PE_PGRS55 | Rv3511  | MRA_3551 | 20.12 | 20.01 | 48.5   | 48.3  | -0.204 | -0.205 |
| PE_PGRS57 | Rv3514  | MRA_3553 | 11.57 | 12.04 | 36.15  | 40.36 | -0.183 | -0.109 |
| PE_PGRS61 | Rv3653  | MRA_3688 | 8.2   | 16.77 | 61.85  | 66.07 | 0.194  | 0.189  |
| PE_PGRS1  | Rv0109  | MRA_0115 | 16.71 | 16.12 | 64.74  | 64.74 | 0.161  | 0.17   |
| PE_PGRS2  | Rv0124  | MRA_0131 | 20.55 | 20.55 | 65.46  | 65.85 | 0.149  | 0.154  |
| PE_PGRS3  | Rv0278c | MRA_0287 | 23.02 | 23.2  | 60.46  | 60.46 | 0.095  | 0.099  |

|           |         |           |       |       |        |        |        |        |
|-----------|---------|-----------|-------|-------|--------|--------|--------|--------|
| PE_PGRS4  | Rv0279c | MRA_0288  | 13.61 | 13.85 | 60.01  | 59.55  | 0.181  | 0.179  |
| PE_PGRS6  | Rv0532  | MRA_0539  | 26.59 | 26.65 | 61.95  | 61.78  | 0.08   | 0.081  |
| PE_PGRS7  | Rv0578c | MRA_0585  | 10.75 | 10.75 | 39.09  | 39.09  | -0.299 | -0.3   |
| PE_PGRS9  | Rv0746  | MRA_0754  | 18.35 | 19.36 | 70.33  | 70.72  | 0.318  | 0.332  |
| PE_PGRS10 | Rv0747  | MRA_0755  | 16.66 | 17.42 | 62.08  | 62.08  | 0.244  | 0.254  |
| PE_PGRS13 | Rv0833  | MRA_0841A | 19.98 | 19.89 | 54.39  | 54.39  | 0.24   | 0.24   |
| PE_PGRS16 | Rv0977  | MRA_0984  | 22.2  | 22.06 | 62.68  | 62.88  | 0.021  | 0.023  |
| PE_PGRS20 | Rv1068c | MRA_1078  | 13.79 | 13.34 | 51.1   | 51.73  | -0.183 | -0.173 |
| PE_PGRS22 | Rv1091  | MRA_1102  | 16.39 | 42.66 | 50.08  | 53.58  | -0.062 | -0.311 |
| PE_PGRS27 | Rv1450c | MRA_1459  | 12.2  | 12.39 | 41.22  | 41.57  | -0.265 | -0.25  |
| PE_PGRS36 | Rv2098c | MRA_2113  | 25.47 | 29.02 | 61.41  | 56.33  | -0.024 | -0.171 |
| PE_PGRS41 | Rv2396  | MRA_2420  | 22.45 | 23.13 | 76.29  | 76.29  | 0.318  | 0.326  |
| PE_PGRS47 | Rv2741  | MRA_2767  | 16.97 | 20.23 | 58.63  | 60.64  | 0.149  | 0.11   |
| PE_PGRS59 | Rv3595c | MRA_3634  | 18.80 | 46.65 | 60.75  | 89.96  | 0.035  | 0.459  |
|           |         | MRA_3635  |       | 33.63 |        | 82.86  |        | 0.282  |
| Wag22     | Rv1759c | MRA_1772  | 16.41 | 25.39 | 56.09  | 82.37  | 0.171  | 0.063  |
| mmp13b    | Rv1146  | MRA_1156  | 41.39 | 41.04 | 108.53 | 107.52 | 0.461  | 0.508  |
| sigM      | Rv3911  | MRA_3950  | 50.93 | 42.7  | 74.46  | 88.27  | -0.535 | -0.253 |
| phoP      | Rv0757  | MRA_0767  | 36.18 | 36.18 | 98.99  | 100.57 | -0.191 | -0.172 |

# Figure S1-A

MRA\_0313 MANTGNINTGAFISGNHNSGLLWRGDNQGLIDLAI GVDIPEIPIVSVVDVNIPIHIPITASFTDIVYSGLDLPNTAVTVIFFGPVDIDP  
 Rv0304c -----

MRA\_0313 FTVPVIRITGPTPVVMVGGPTTAINIGATVVVDAINIPIIHIPATPGFGNSTGGLSSGFFNSGAGSASGFGNFGGAASGF170==2373  
 Rv0304c -----001==2204

SubName: Full-PPE FAMILY PROTEIN;

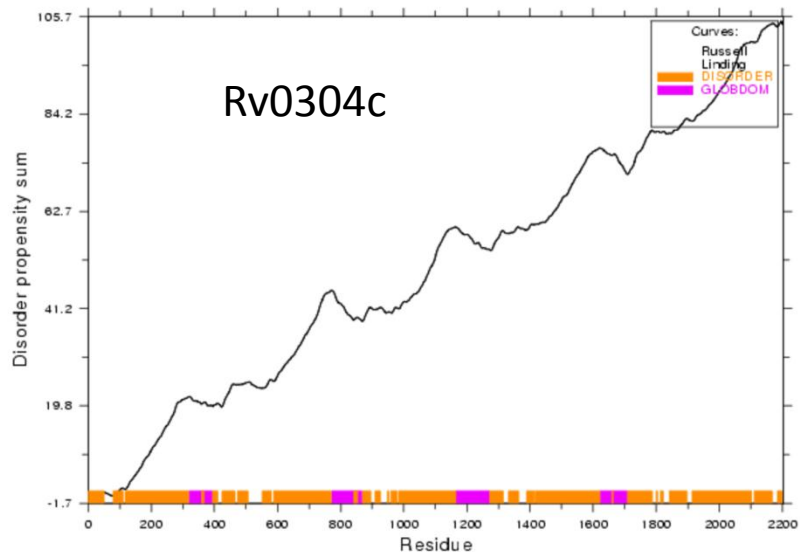

SubName: Full-PPE family protein;

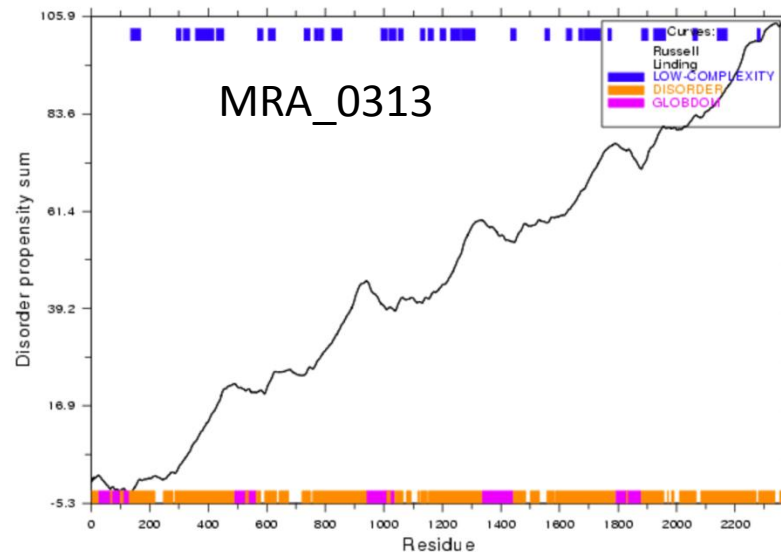

# Figure S1-B

MRA\_2113 -----M02=322WRQRW  
 Rv2098c MSFVIASPEALLAAATDLAAIRSTIRAANAAAAPVTTGALAPAADEVSAAGIAALFQAQSYQAVSAQAAAFHDRFVQL80=400GGSGG  
 :\*\*\*\*\* .

MRA\_2113 -----PTAACGTATVAPAGPPAKGG-----PA  
 Rv2098c NGGVWYGNNGGAGGAAGQGGPGMNTTSPGGPGGVGGHGGTALLFGDGGAGGAGAAGGPGTDPGAAGPGGSGGTGGLLFGVPGPSGPDG  
 .. \* \*.:\*.\*\* . \*\* .

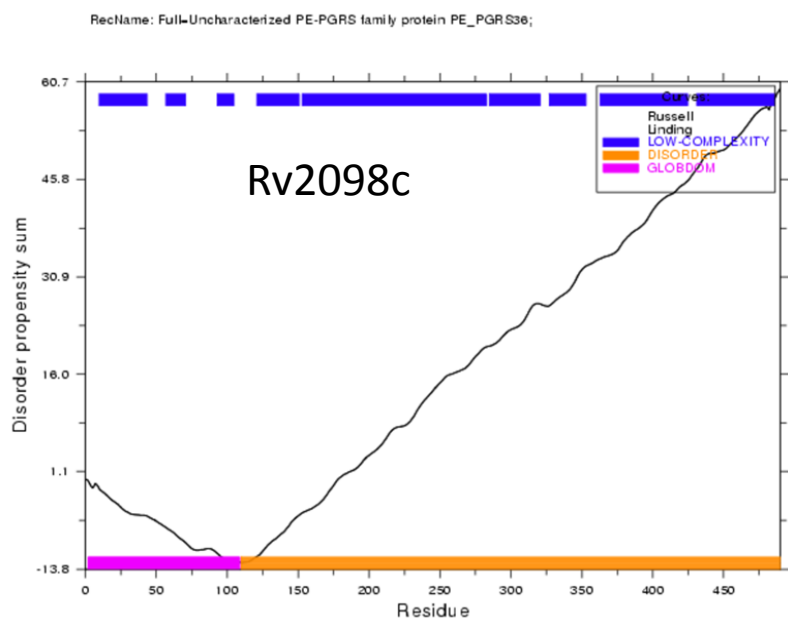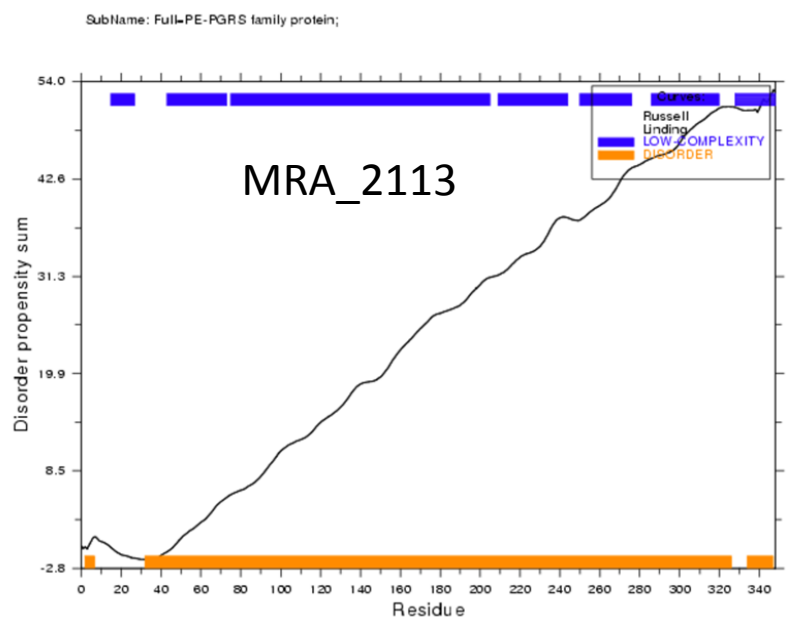

# Figure S1-C

MRA\_1102 1=470S500RGRRP**RVAVRRWRGWRERRGRGRRRRRRRPSRRWRRERRQWRQRRQWRQWRQRRHRGVAVRQR**-----  
 Rv1091 1=470G500GAAGPA-----**GWLFGDGGAG**-----**GNGGAAAAGGAGGQAGGGGGNGGNGGNG**  
 \*\*\*\*\*.\*\*\* . \* \*\* \* . : \*.\*.

MRA\_1102 -----  
 Rv1091 **GNGGNGGNGATGGWLYGNGGAGGQGATAGAGGAGANGVSVSTNGGGTGGNGGIGGTGSSGGAGGNAGLLGVGGAGGHGASGGAGDRGGAGG**  
 : \*.\*.

MRA\_1102 -----  
 Rv1091 **TGFISSDGGAGGDGGDGGNGGAGGTGGLLFGAGNGGPPGSSGAADIGGNGGAGNGGGTDGNGGNGSSGGGAGSGGDGGGAGGNGAWLFG**

MRA\_1102 -----  
 Rv1091 **NGGAGGGGGKGGNGAGGGLGGGSFGLPGLNNGSGDGGDGGNGAPGGVLYGNGGAGGQSSGGIGGPGATGGAGGKGGDGGDAQLIGDGG**

MRA\_1102 -----**RGRRPG**-----**RHRRSRRSRR**  
 Rv1091 **NGGNGGAGGTGGTGGPGGPGGSSGGLGGLLFGQTGTAGVSP**  
 \* \*\* : :

SubName: Full-PE-PGRS FAMILY PROTEIN;

SubName: Full-PE-PGRS family protein;

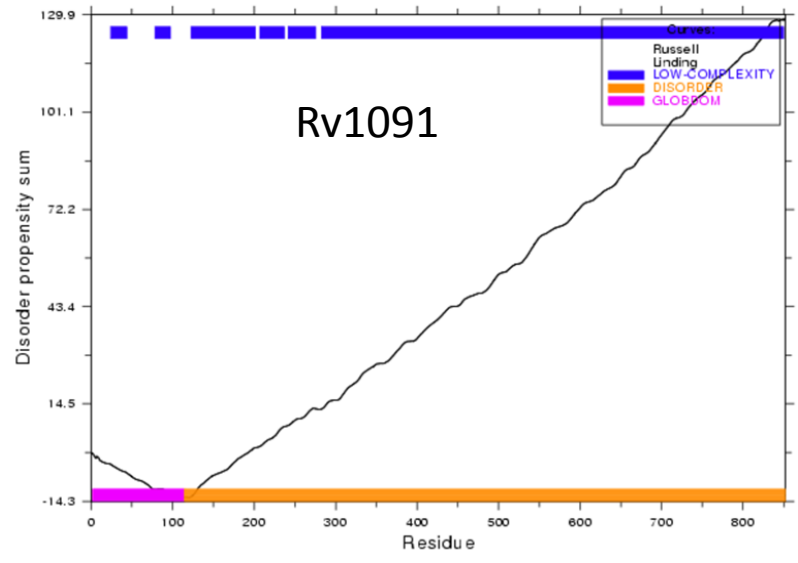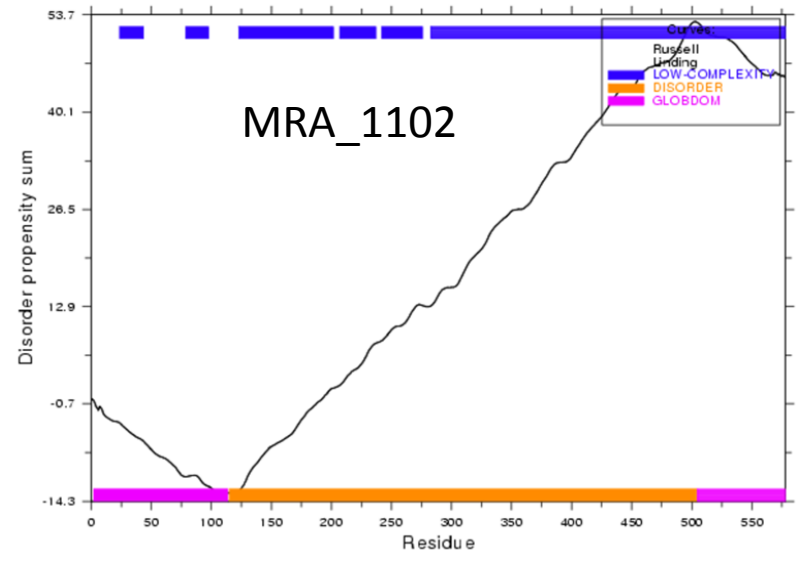

# Figure S1-D

MRA\_3635 1=162TADP-----VVPA-----  
 Rv3595c 1=162NGGSGGAGGAGAAGGSGGQGGLLYGNGGAGGNGGAATI PGGNGGAGGAGGNALWLFNGGAGGLGAAGAAGAAGVNPLTVPAGQGSMDN  
 \*\*\*\*\*.....

MRA\_3635 --EPVRPAGPADKAGCCTATA-----  
 Rv3595c NGEPPGGPQPGTEFGQTGGTGGTGGTGLSVGGTGGTGGTGGTGGAGGSGGRGGLLVGDGGAGGIGGTGGEGGIGARGGTGGQGGMGGAGQPGV  
 \*\* \* . \* . : \* . \*

MRA\_3635 -----ARAATAGRRLSPAATAAPVVPAATRYSATVGPGG--SARPARRVPPGSTP  
 Rv3595c GGDAGDGGNGGIGGDGGAGGDGGAGGAGGAGGLFGVSGSSGLGGAAGSGGNGGGGEGPVGAGSPGVGPAGRGGDGNLQGFGPEGAPGQPGQPGQPG  
 .....\* \* .:\*\*\* \*\* ..\* \* .: \*\*..

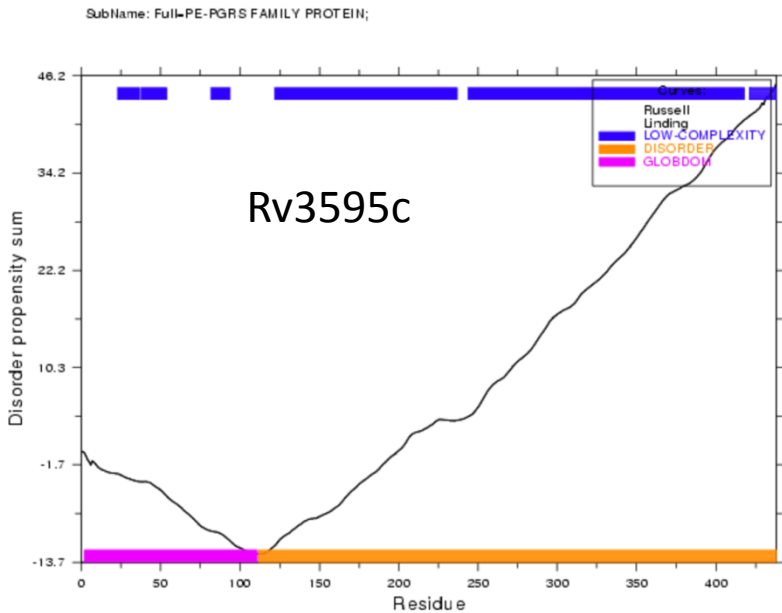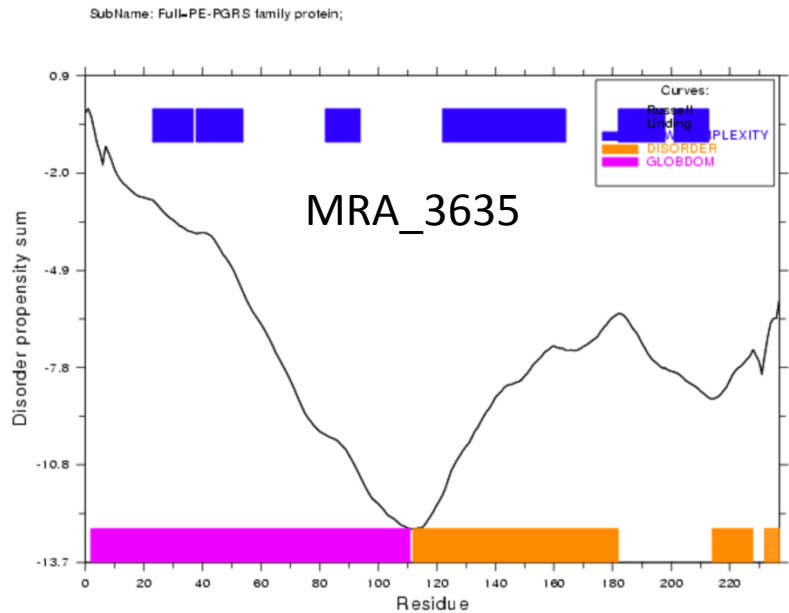



# Figure S1-E

MRA\_3634 -----MNRADPASQAPSSGKPVAP-----  
 Rv3595c MSFVIAVPEFLSAAATDLANLGSTISAANAAASIPPTGVLAAGADDVSAAIAALFGAHAQAYQTI SAQAATFHAQFVQTL SAGAGAYANAEEAANV  
 :. \*:.\*:. \*:\* \* \*

MRA\_3634 -----VALAVLACPLAGPA-GPAAPGGPAGPAALAVGVGSWSATA--AQVASGAQGAKAASAPGAAPAVRAEWAAPGNQA-----  
 Rv3595c QQSLLNAINAPTQALLGRPLIGDGADGTAPGQNGGAGGLLYGNNGGAAGVNAGIAGGSGGAAGLIGNGSGGAGGAGAAGGSGGQGGLLYGNNG  
 : \*:.\* \*\* \* . . :\*\*\* .\*...\* \* \* .\*. :\*. \* \*:.\*: \*\* . . \*.: . . \* \* \* . .

MRA\_3634 -----LGVTLLVTGVTAGSAVTAAP---  
 Rv3595c AGNGGAATIPGGNGGAGGAGNAWLFGNGGAGGLGAAGAAGAAGVNPLTVPAGQGSMDNNGEPGGPGQPGTEFGQTGGTGGTGLSVGGTGG  
 : \* \* \* \* \* \*.\*:.....

MRA\_3634 -----AETAARAARAARAACSASPVAPGWAVPPVAGVMAGAV-----VSPVWPAP  
 Rv3595c TGGTGGTGGAGGSGRGGLLVGDGAGGIGGTGGEIGIGARGGTGGQGMGGAGQPGVGGDAGDGGNNGIIGDGGAGGDGGAGGAGGAGGLFGVS  
 . \* ..... \*\* . . . . \* . \* \* . \* . . . . . . . . . . : : . .

MRA\_3634 RALGLRAVAATATSASS----ALKVHP-ASPASRASPVDIVAAGPSA-PRRLLEQLPSVTGPVEALARVEFCGQGVLDIAELG  
 Rv3595c GSSGLGGAAGSGNGGGGEGEPGVAGSPGVGPAGRGGDGNLGQFQFPEGAPGQP-----GQPGQPG  
 : \*\* ..\*:. . . . . . . : : \* ..\*\*.\*.. : : \*\*.. \* : . . : \*

SubName: Full-PE-PGRS FAMILY PROTEIN;

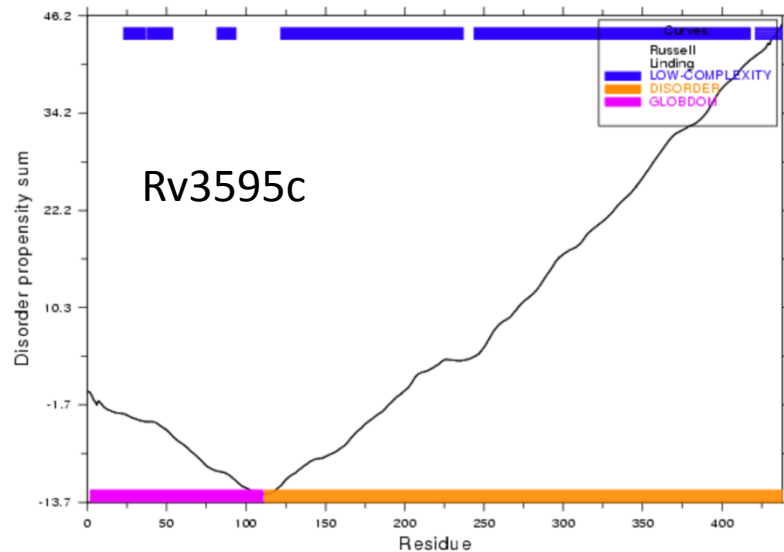

SubName: Full-PE-PGRS family protein;

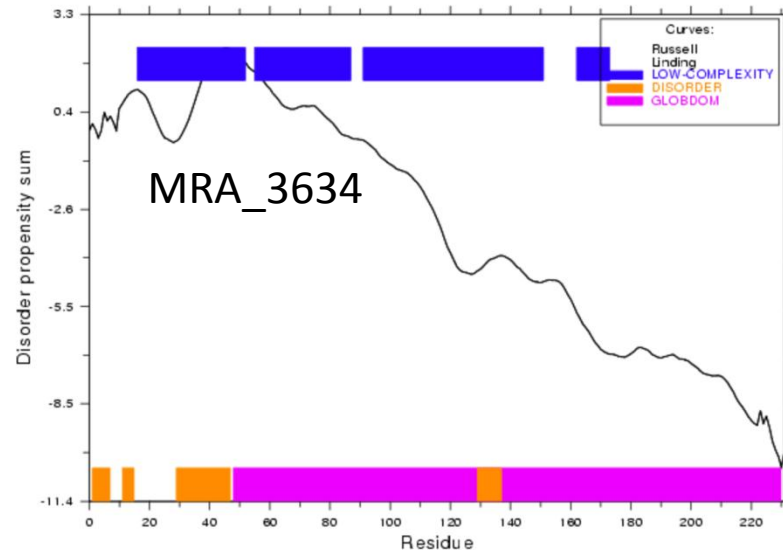

# Figure S1-F

MRA\_1156  
RV1146

MFSAVTVALSMSATALFPMYFLKSFAYAGV31==499  
-----M02==470  
:\*\*\*\*\*

SubName: Full-PROBABLE CONSERVED TRANSMEMBRANE TRANSPORT PROTEIN Mmpl13b;

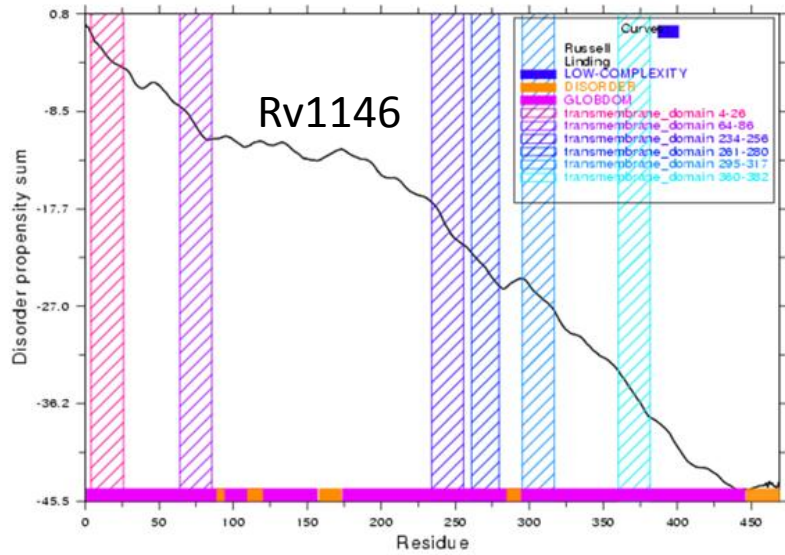

SubName: Full-Putative conserved transmembrane transport protein Mmpl13b;

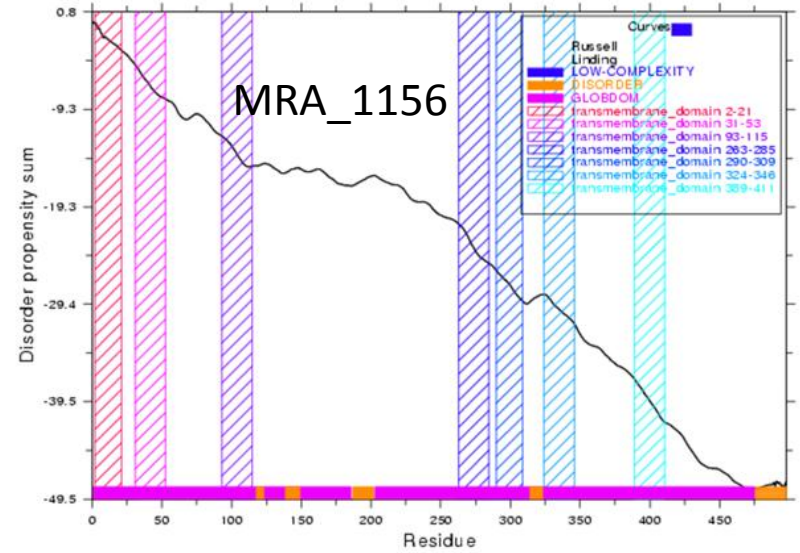

# Figure S1-G

MRA\_3950  
Rv3911

MQGYSIADTARMLGVAEGTVKSR-----ARARARLARLLGYLNTGVNIRR  
 MQGYSIADTRPDAGRGRGRHROEPLRPGAGPPSAAAGLSQHRGEHPALTPLPVRRSIDPRARRYPTSGYCHRA  
 \*\*\*\*\* \* ..\* :. . \*: .\* \* .:\* \*

SubName: Full-POSSIBLE ALTERNATIVE RNA POLYMERASE SIGMA FACTOR SIGM;

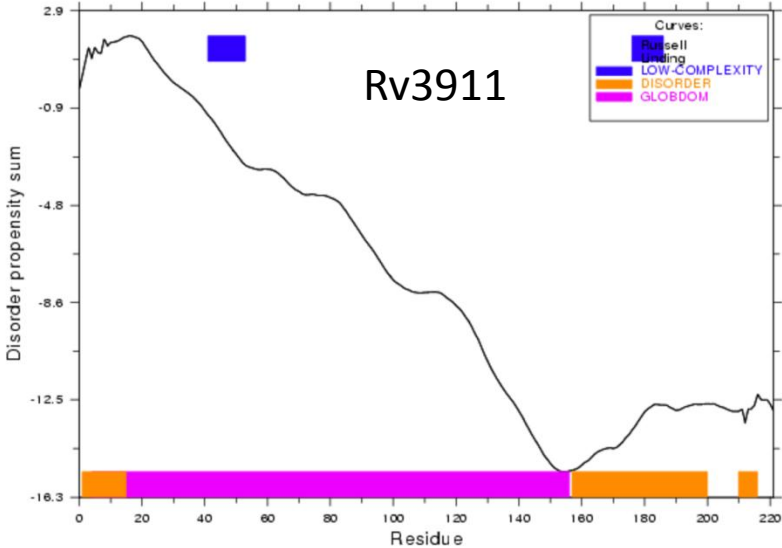

SubName: Full-RNA polymerase sigma-70 factor;

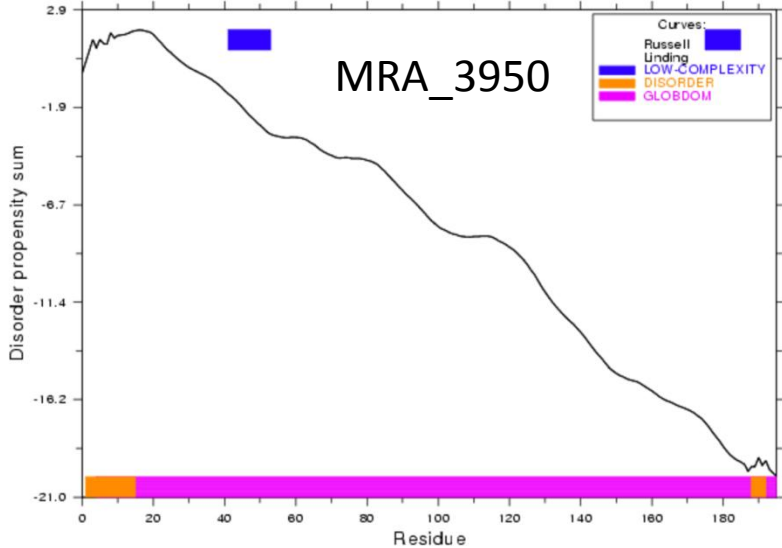

# Figure S1-H

MRA\_0767  
Rv0757

1==200HVWRYDFGGDVNVVESYVLYLRRKIDTGEKRLHHTLRGVGYVLRPR  
1==200HVWRYDFGGDVNVVESYVSYLRRKIDTGEKRLHHTLRGVGYVLRPR  
\*\*\*\*\*

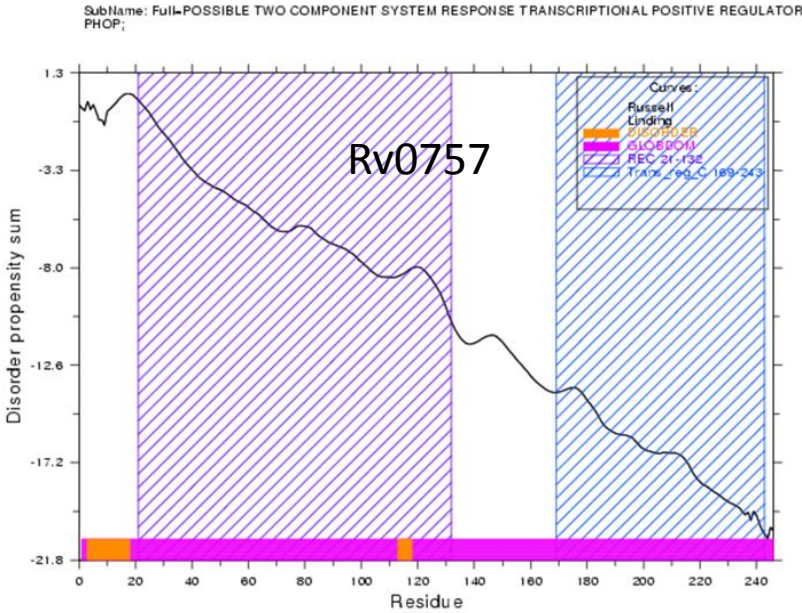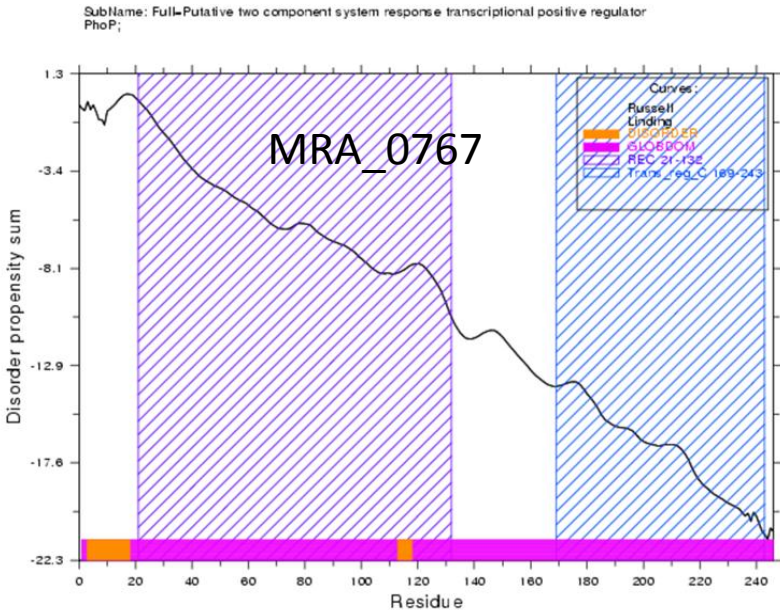

Figure S2-A

MRA\_0265  
Rv0256c

-----1 M 2=====520  
1 MTAPIWMA SPPEVH SALLSSGPGPGPLLVS AEGW HSL 38=====520  
: \*\*\*\*\*

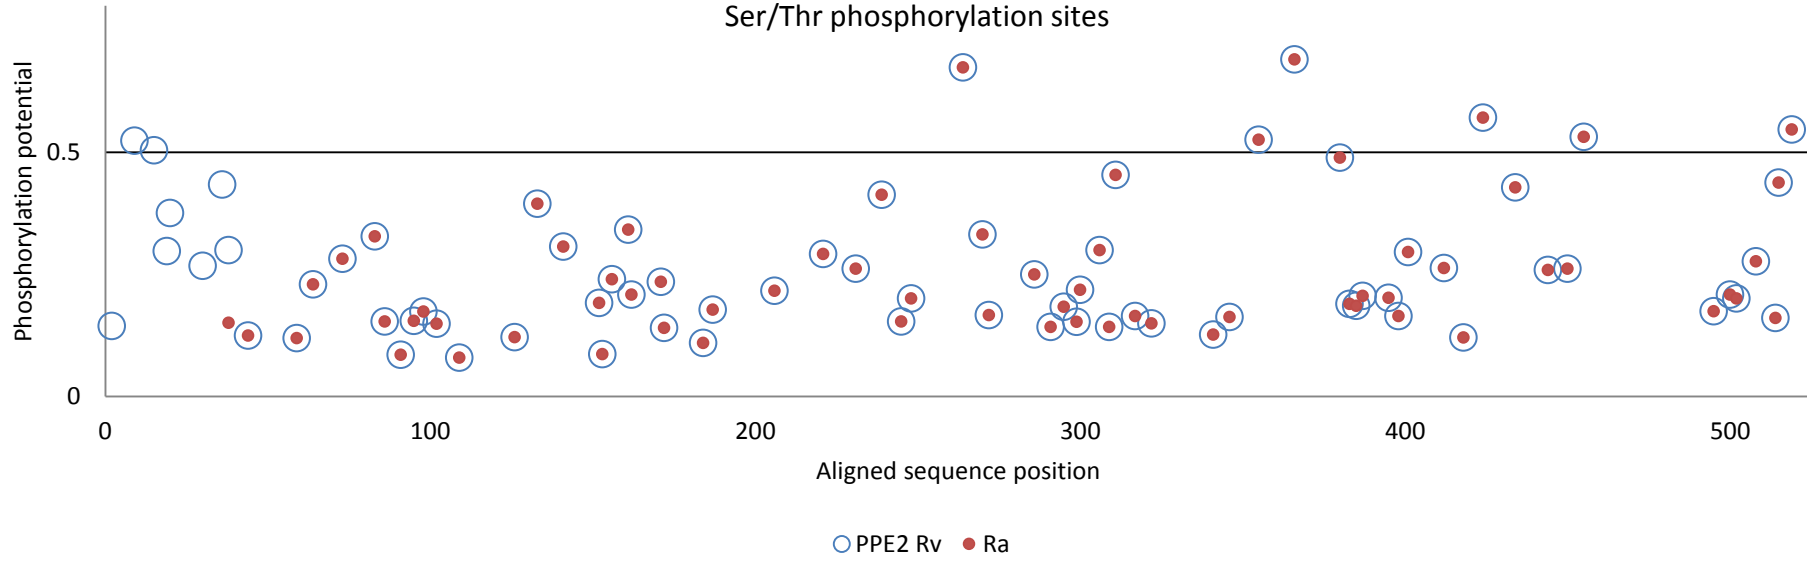

# Figure S2-B

MRA\_0295  
Rv0286c

----- 1M2 =====497  
1MAAPIWMA SPPEVH SAL18 =====513  
: \*\*\*\*\*

## Ser/Thr phosphorylation sites

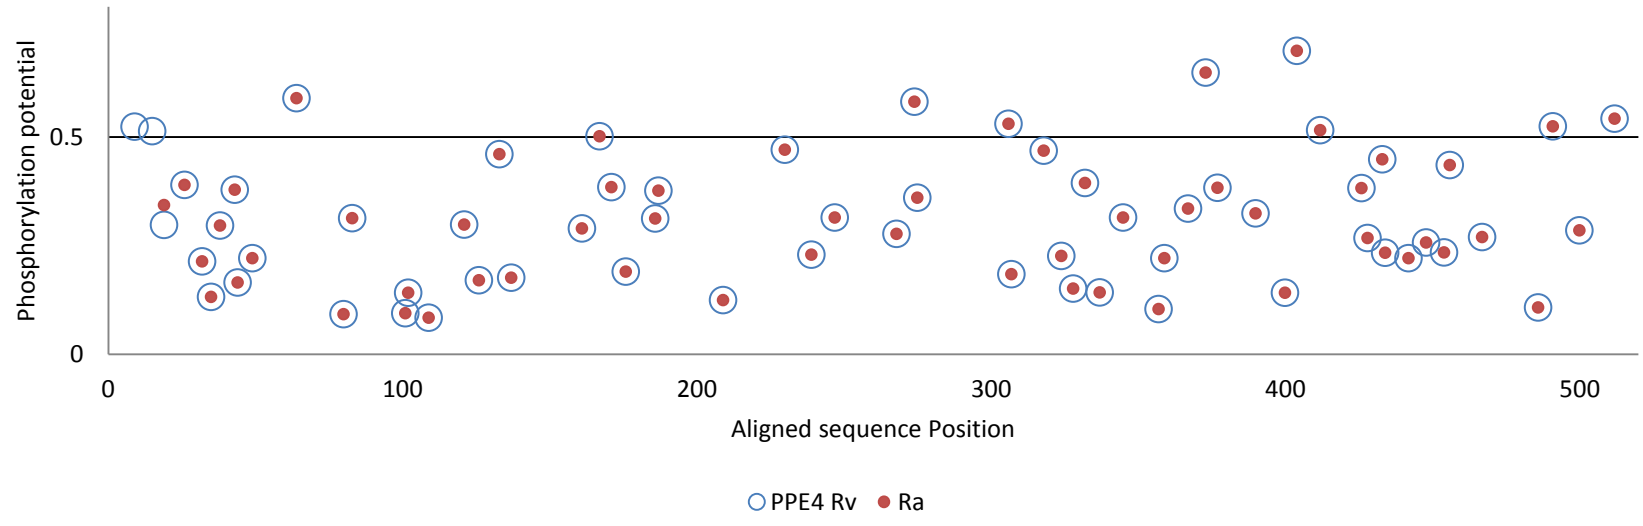

Figure S2-C

MRA\_0763  
Rv0754

---M2=====581  
MSFV5=====584  
:\*\*\*\*\*

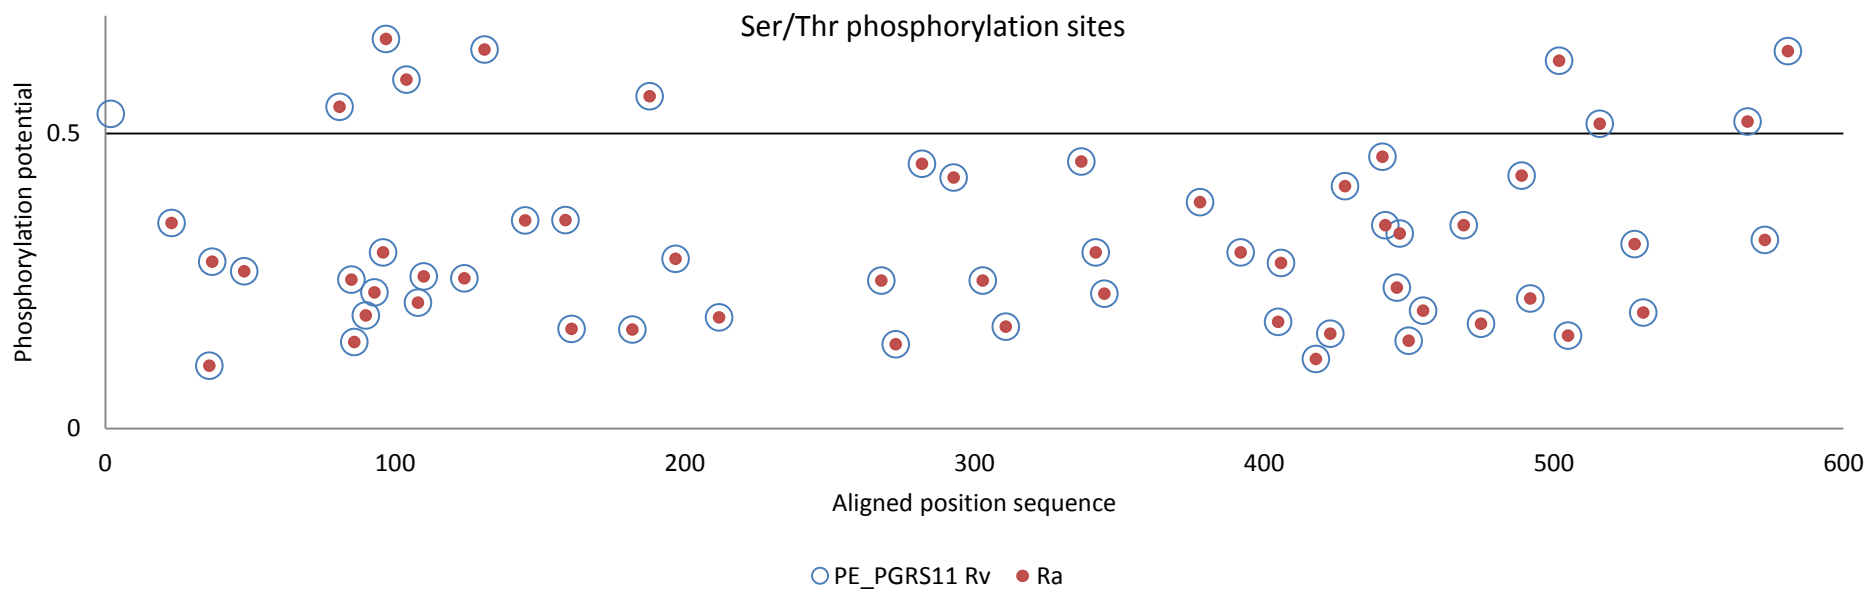

Figure S2-D

MRA\_0313  
Rv0304c

MANTGNINTGAFISGNHSNGLLWRGDNQGLIDLAIQVDIPEIPIVSVDVNIPIHIPIPTASFTDIVYSGLDLPPNTAVTVIFFGPVDIDP

MRA\_0313  
Rv0304c

FTVPVIRITGPVVMVGGPPTTAINIGATVVVDAINIPIIHIPIATPGFGNSTGGLSSGFFNSGAGSASGFGNF~~GAASGF170~~==2373  
-----001==2204

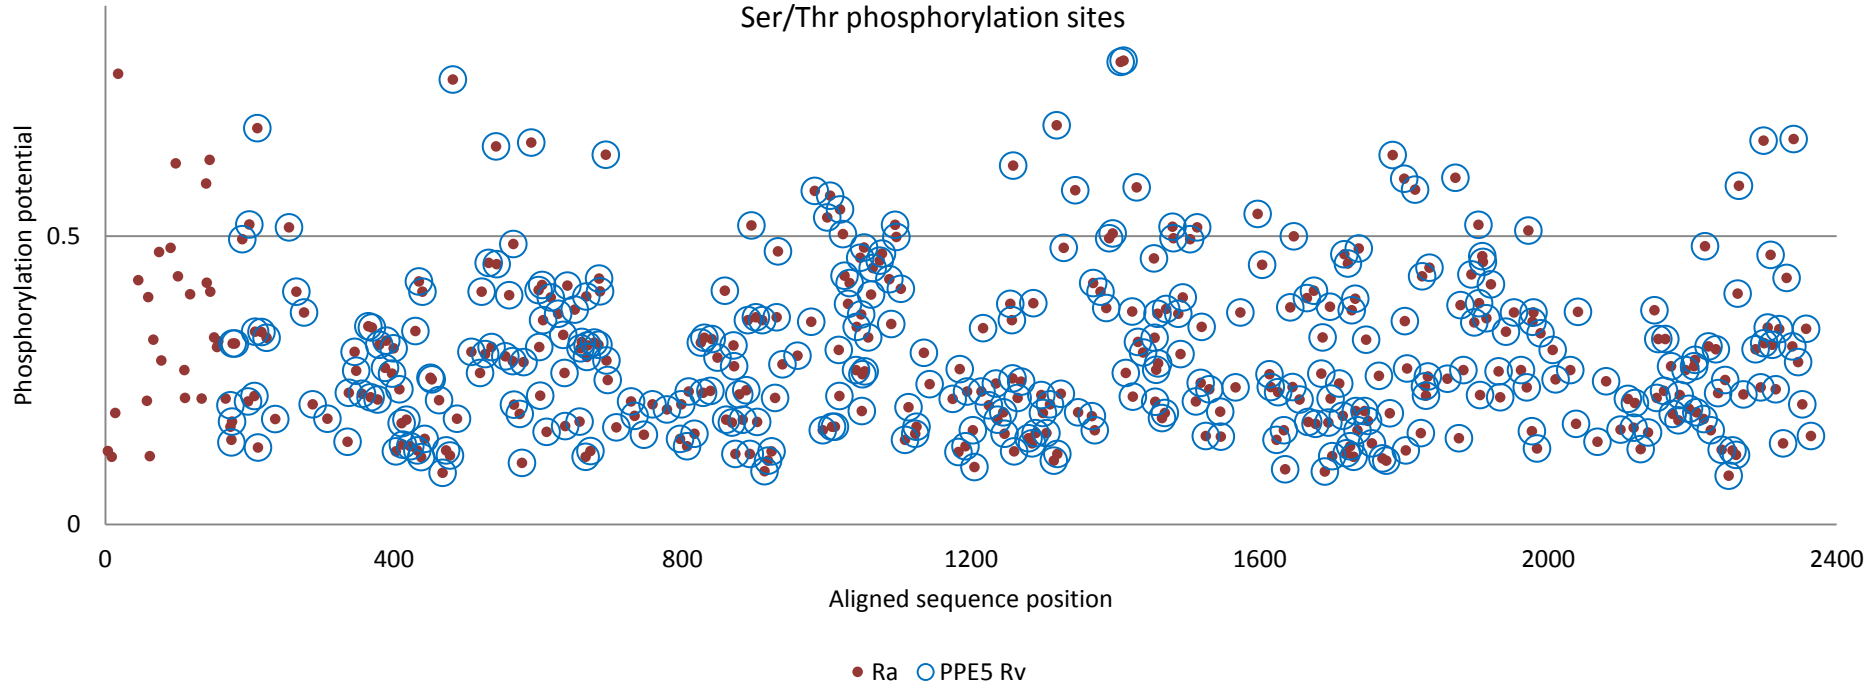



Figure S2-E

MRA\_2767  
Rv2741

MHRLGRYTIPMHSLEGELAILGRHDGLWRVWRSQ1==304G306==559  
-----1==270S272==525  
\*\*\*\*\*.\*\*\*\*\*

Ser/Thr phosphorylation sites

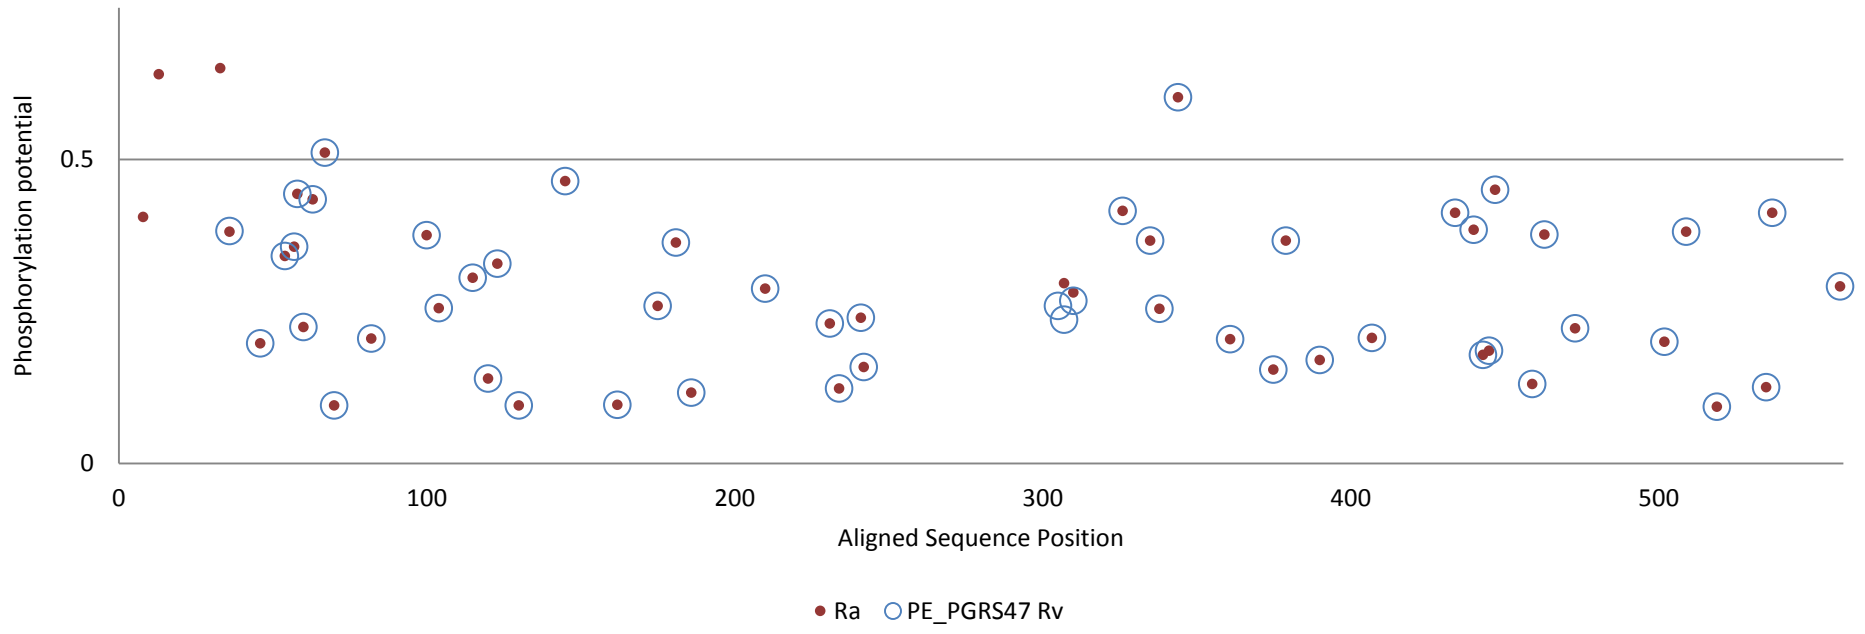

Figure S2-F

MRA\_1205  
Rv1195

MIVPVRVLGPFEDGVHVS=====115  
-----MS=====99  
:\*\*\*\*\*

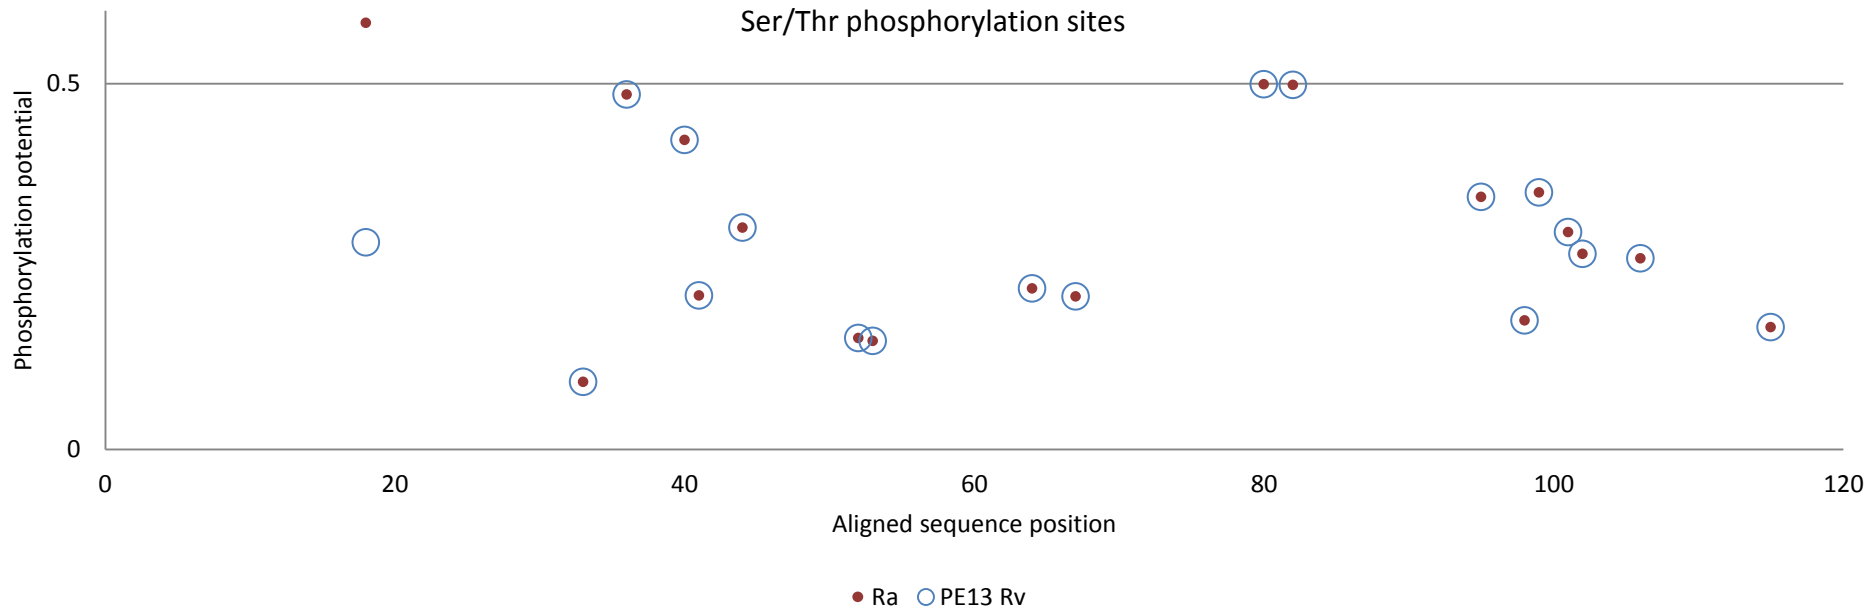

# Figure S2-G

```

MRA_1102 1=470S500RGRRRPRRVAVRRRWGRWRERRRGRGRRRRRRRPSSRRWRRERRQWRQRRQWRQWRQRRHRGVAVRQR-----
Rv1091   1=470G500GAAGPA-----GWLFGDGGAG-----GNGGAAAAGGAGGQAGGGGGNGGNGGNG
          *****.*** . *          ** * .          : *.*.

MRA_1102 -----
Rv1091   GNGGNGGNGATGGWLYGNGGAGGQGATAGAGGAGANGVSTNNGGGTGGNGGIIGGTGGSSGGAGGNAGLLGVGGAGGHGASGGAGDRGGAGG
          : *.*.

MRA_1102 -----
Rv1091   TGFIISSDGGAGGDGGDGGNGGAGGTGGLLFGAGGNGGPPGSSGAADIGGNGGAGNGGGTDGNGGNGSSGGGAGSSGDGGGAGGNGAWLFG

MRA_1102 -----
Rv1091   NGGAGGGGGKGGNGAGGGLGGGSFGLPGLNGSSGDGGDGGNGAPGGVLYGNGGAGGQGSSGGIGGPGATGGAGGKGGDGGDAQLI GDGG

MRA_1102 -----
Rv1091   -----RGRRPG-----RHRRSRRSRR
          * **          : :
  
```

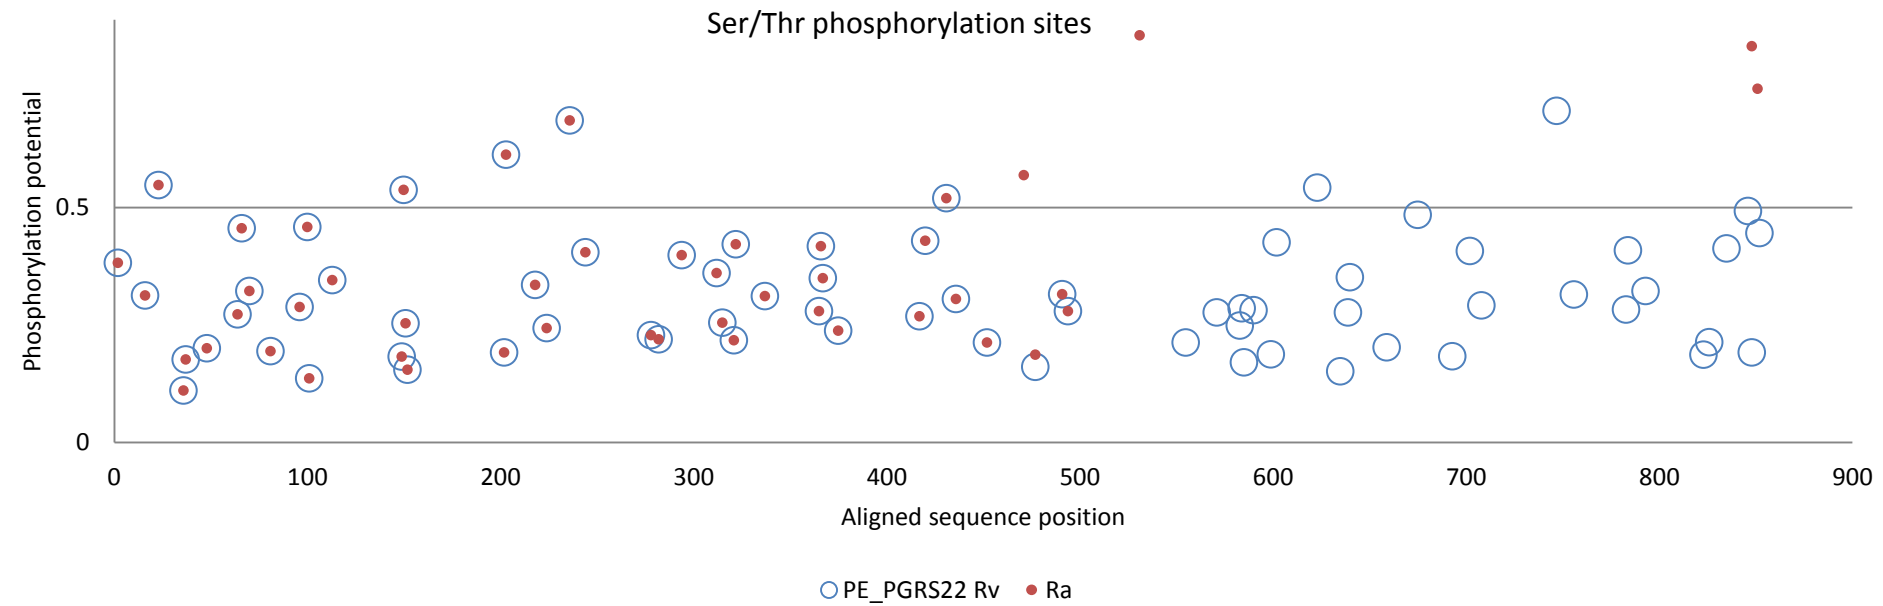

Figure S2-H

```

MRA_3428      1==444-----
Rv3388       1==444AGGNNGGAGGAGGQLYGNNGDGNGGAGGANIAGGNNGSDGGAAGHGAGGSARLIGAGGHGGDGGAGGNTAGRRAD
*****

MRA_3428      -----445==582
Rv3388       AIAGTGDDGGNNGNGLLSGNAGAGGHGGAGGSSTATTTTGTPTGATGGNNGGAGGTAGFTGSGGIGGNGG594==731
*****
  
```

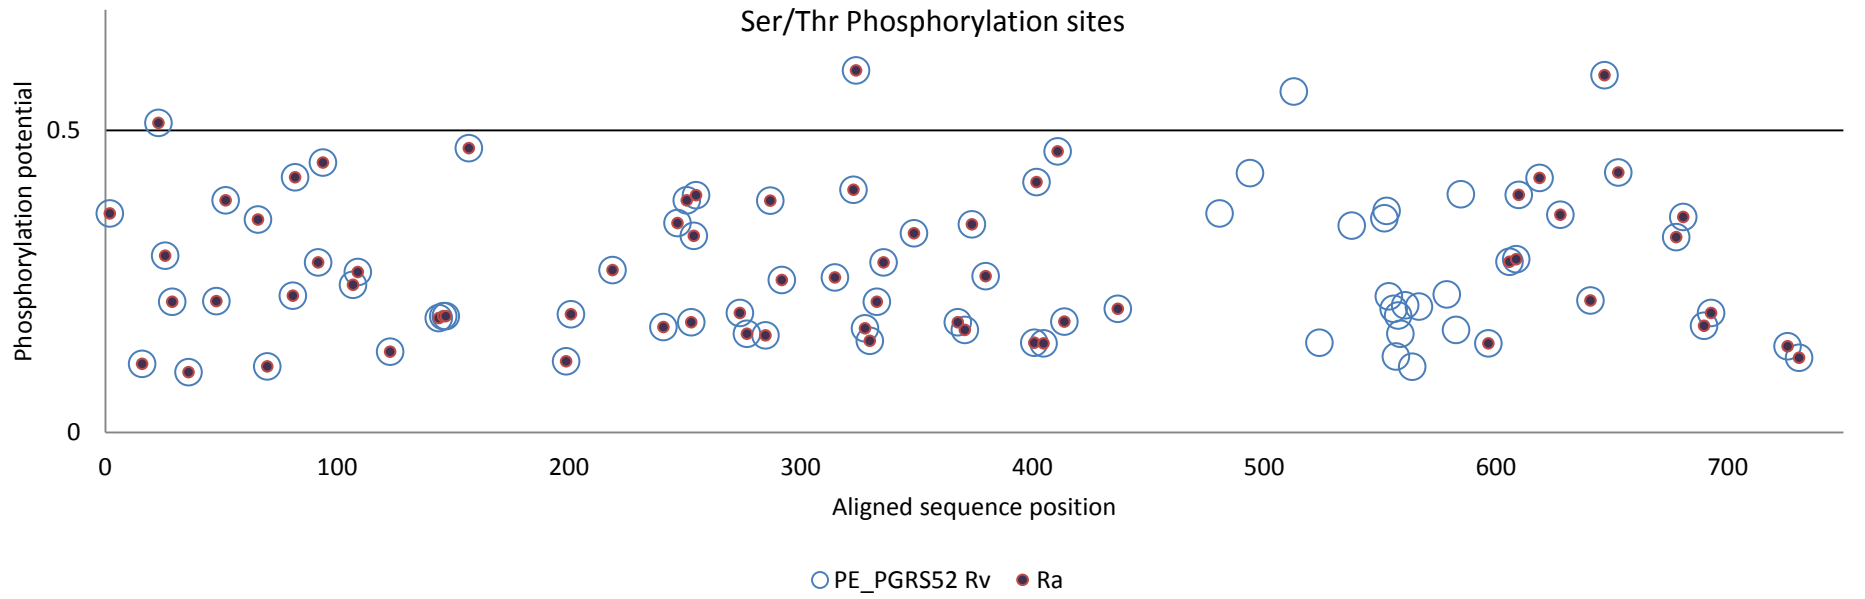

Figure S2-I

```

MRA_2113 -----M02=322WRQRW
Rv2098c  MSFVIASPEALLAAATDLAAIRSTIRAANAAAAPVTTGALAPAADEVSAAGIAALFGAQAQSYQAVSAQAAAFHDRFVQL80=400GGSGG
                                                :***** .

MRA_2113 -----PTAACGTATVAPAGPPAKGG-----PA
Rv2098c  NGGVWYGNNGGAGGAAGQGPGMNTTSPGGPGGVGGHGGTAILFGDGGAGGAGAAGGPGTPDGAAGPGGSGGTGGLLFGVPGPSGPDG
                                                .. *  *.:*.** . **
    
```

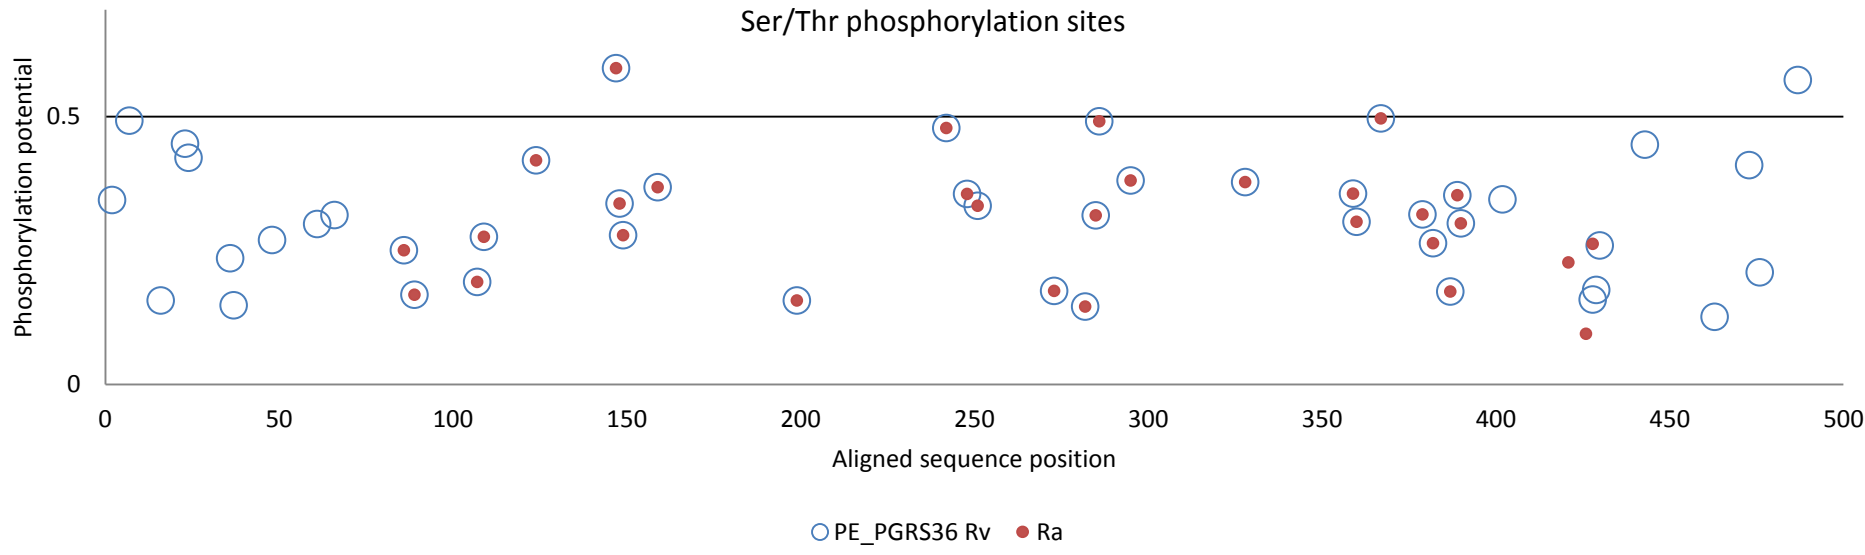

Figure S2-J

MRA\_0363 MRV4=127NSGFQNFGNLLSGWANLGNTVSGFYNTSMLDLATQALISGFGNHGARLSGILNNGSGP  
 Rv0354c M--2=125IR-----ASKTSATCCRAGRT  
 \* \*\*\*\*\* . . : \* . . . . .

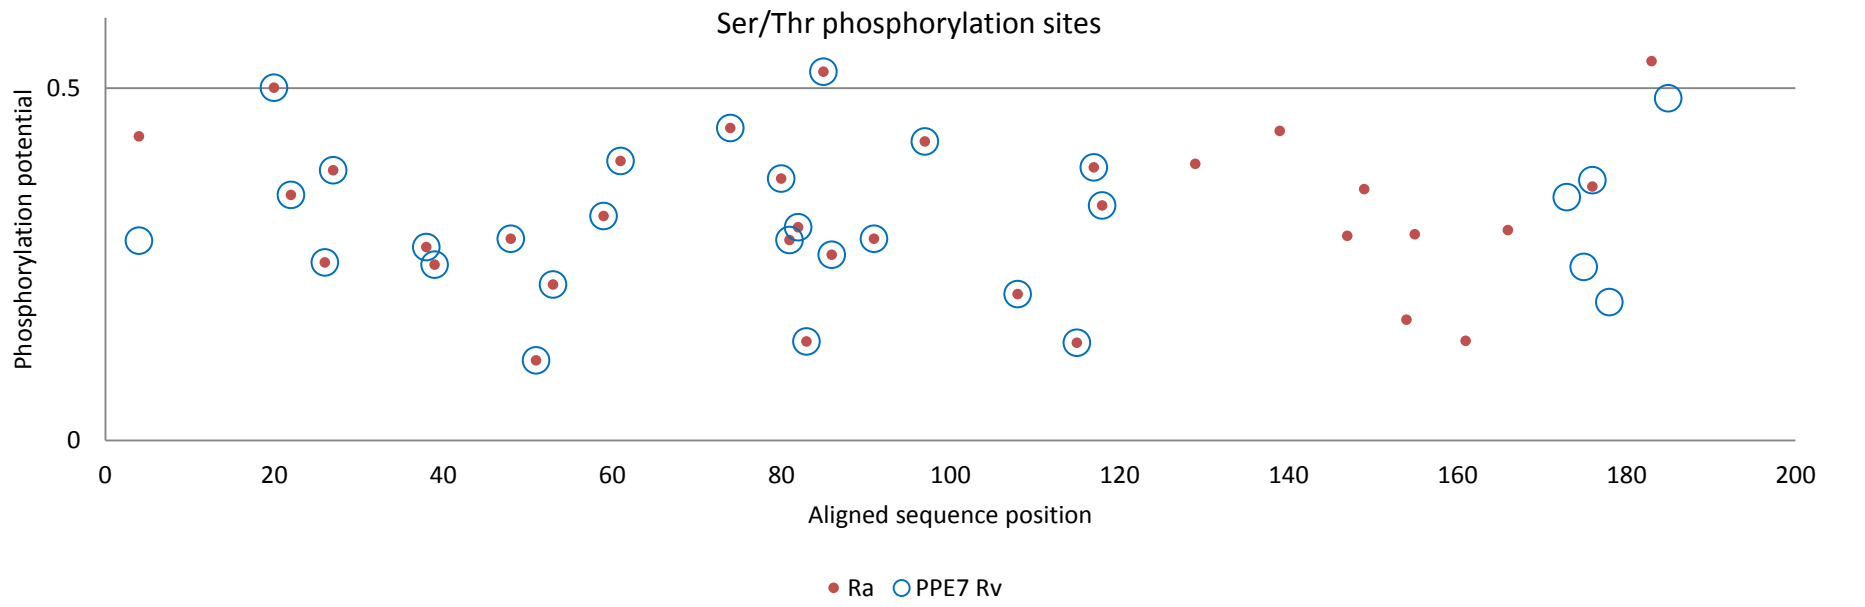

# Figure S2-K

```

MRA_1772 MEHRLGRLPAHTLIGTDSPGAEASWVVGITWWSAVVGGFQ41=175RLCRRRGR-----
Rv1759c -----01==85AYAAAEAAAVTPLLNSINAPVLAATGRPLIENGANGAPGTGANGGDAGWLIENG
                ***** .. ..

MRA_1772 -----
Rv1759c GAGGSGAKGANGGAGGPGAAGLFGNGGAGGAGGTATANNIGGAGGAGGSAMLFGAGGAGGAGGAATSLVGGIGGTGGTGGNAGMLAGAAGAGGAGGFS

MRA_1772 -----
Rv1759c FSTAGGAGGAGGAGGLFTTGGVGGAGGQGHGTGGAGGAGGAGGLFGAGGMGGAGGFGDHGTLLGTGGAGGDGGGGGLFGAGGDGGAGGSSGLTTGGAAGNGGN

MRA_1772 -----
Rv1759c AGTLSLGAAGGAGGTGGAGGTVFGGGKGGAGGAGGNAGMLFGSGGGGGTGGFGFAAGGQGGVGSAGMLSGSGGSGGAGGSSGPPAGTAAGGAGGAGGAPG

MRA_1772 -----RD-----
Rv1759c LIGNGGNGGNGGESGGTGGVGGAGGNAVLIGNGGEGGIGALAGKSGFGGFGLLLGADGYNAPESTSPWHNLQQDILSFINEPTEALTGRPLIENGDSGT
                :*

MRA_1772 -----
Rv1759c PGTGDDGGAGGWLFNGGNGGAGAAGTNGSAGGAGGAGGILFGTGGAGGAGGVGTAGAGGAGGAGGSAFLIGSGGTGGVGAATTTGGVGGAGGNAGLLI

MRA_1772 -----
Rv1759c GAAGLGGCGGGAFTAGVTTGGAGGTGGAAGLFGANGGAGGAGGTGSTAGGAGGAGGAGGLYAHGGTGGPPGGNGGSTGAGGTGGAGGPPGGLYGAGGSSGGAGG

MRA_1772 -----AAAQLDQRR-----
Rv1759c HGMAGGGGGVGGNAGSLTLNASGGAGGSSGSSLSGKAGAGGAGGSAGLFYSGGAGGNGGYSLNGTGGDGGTGGAGQITGLRSGFGGAGGAGGASDTGA
                ...*. :*

MRA_1772 -----PGRYRPSADR-----
Rv1759c GGNGGAGGKAGLYNGGDGGAGGDGATSGKGGAGGNAVVIIGNGGNGGNAGKAGGTAGAGGAGGLVLRDQGHGLT
                ** .
    
```

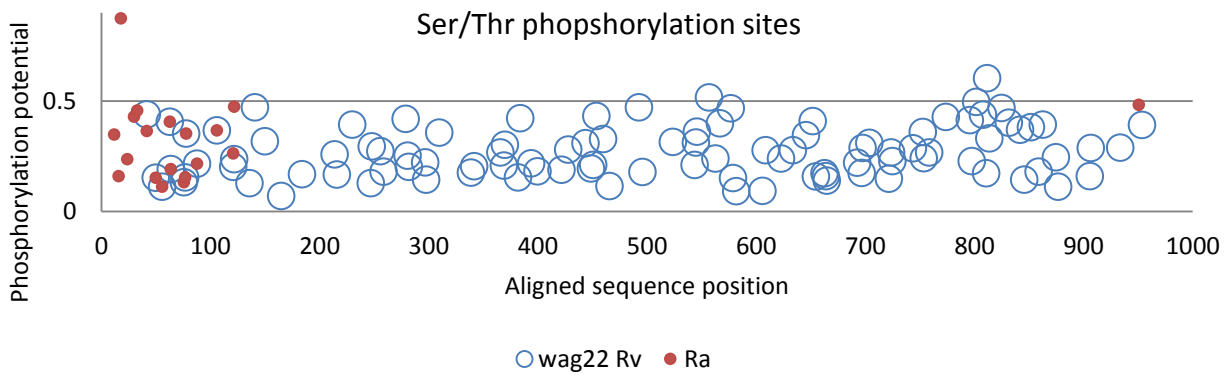

# Figure S2-L

```

MRA_3553      1=57L59===653-----
Rv3514      1=57F59===653KAGGSSSAGGTTNSSGSAGGTGRQSGTGGAGGAGADNPTGIGGTGGDGGTGAAGAGGAGGAAGTGGTGGMIGTTGNAGVG
*****:*****

MRA_3553      654=723V725=768AGGAGGAGGSSGAGSTNGSGGAGGTGGQGG799==965-----
Rv3514      734=803I805=848---AGGSGGSSCAGGTNGSGGAGGTTCGQVV876=1042AGGAGGKGGAGGSSGAGGTNGSGGAGGAGGQGGAGGAGIS
*****:*****   ***:****  ** .***** **  *****

MRA_3553      -----
Rv3514      FSNGSNGGTGGTGGVGGTGGDGGNAGTGAGDPGKGGTGGTGGTGGSGGAGGSSGGANFNNGGTGGTGGTGGTGGKGGMGGIAGDGGPPGGDGGNAG

MRA_3553      -----AGGAGGKGGAGGNAGTGAIGSGAG
Rv3514      VGGKGGTNGNGSSGGTGGTGGAGGNAGAGGLANTGGTAGNAGIGGDGGQGGNGGQGDSDSGLGGQPGFAGGPPGGKGGAGGNAGTGGTNGSGAG
*****:*****

MRA_3553      GAGVQCGAGGAGISFSNVSNGGTGGTGGVGGTGGGGGIAGTGAADPGKGGTGGTAGTGGSSGSSGGANLYGGTGGTGGTGGTGS1076=1211
Rv3514      GAGGQGGAGGAGISFSNVSNGGTGGTGGVGGTGGDGGNAGTGAGDPGKGGTGGTGGTGGSSGAGGSSGGANFNNGGTGGTGGTGGTGGTGS1354=1489
*** * ***** ***** .** ***** .***** .*****:*****: ***** .*****

```

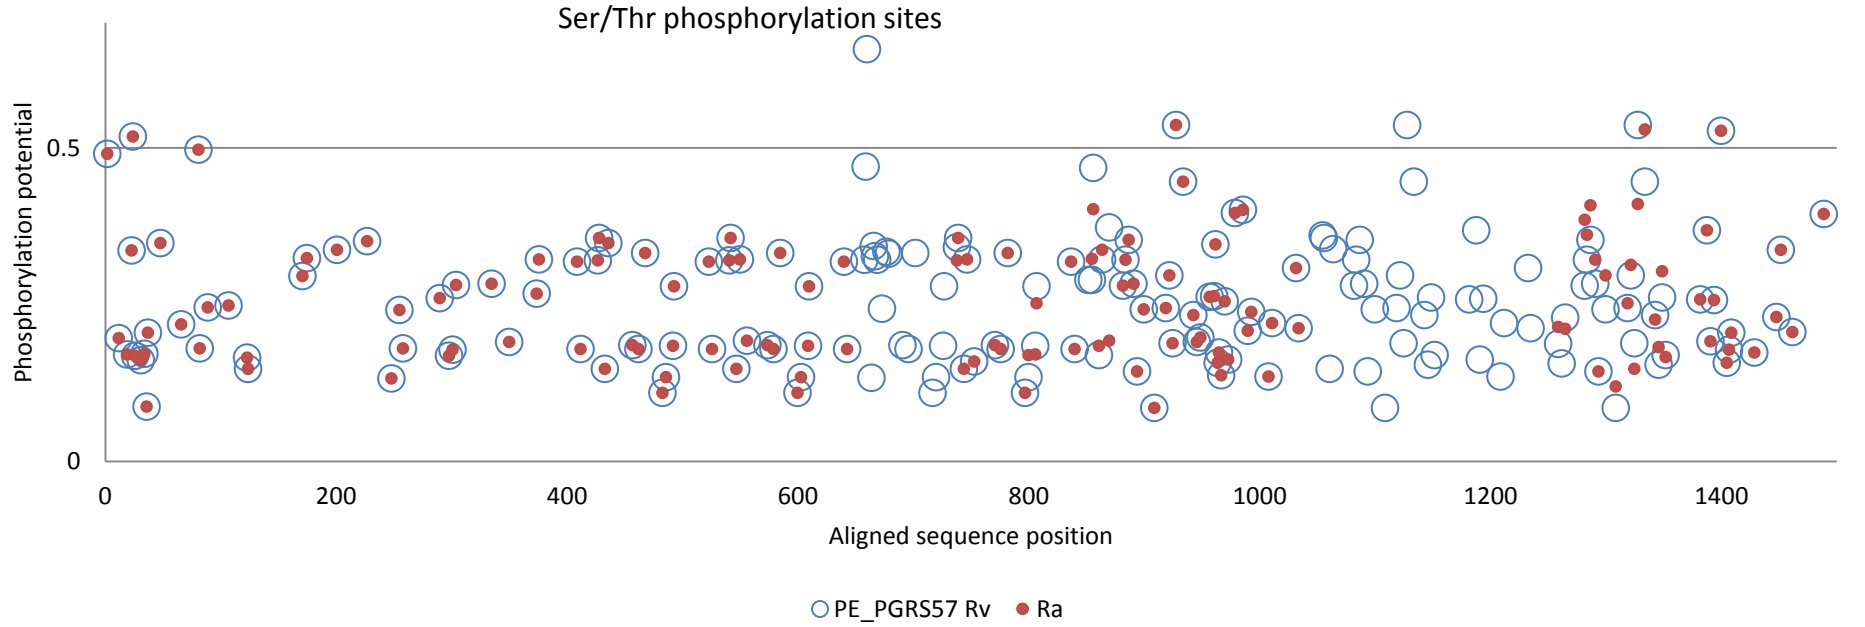



Figure S2-M

MRA\_0288  
Rv0279c

1=324S326=351G353=371S373=776KKKGDGGAGGFGAGTGGYGGVGG799==837  
1=324N326=351C353=371I373=776NNGGDGGAGGFGADTGGN**SS**SVP799==837  
\*\*\*\*\*.\*\*\*\*\* \*\*\*\*\*: \*\*\*\*\*.\* \*\* .. \*\*\*\*\*

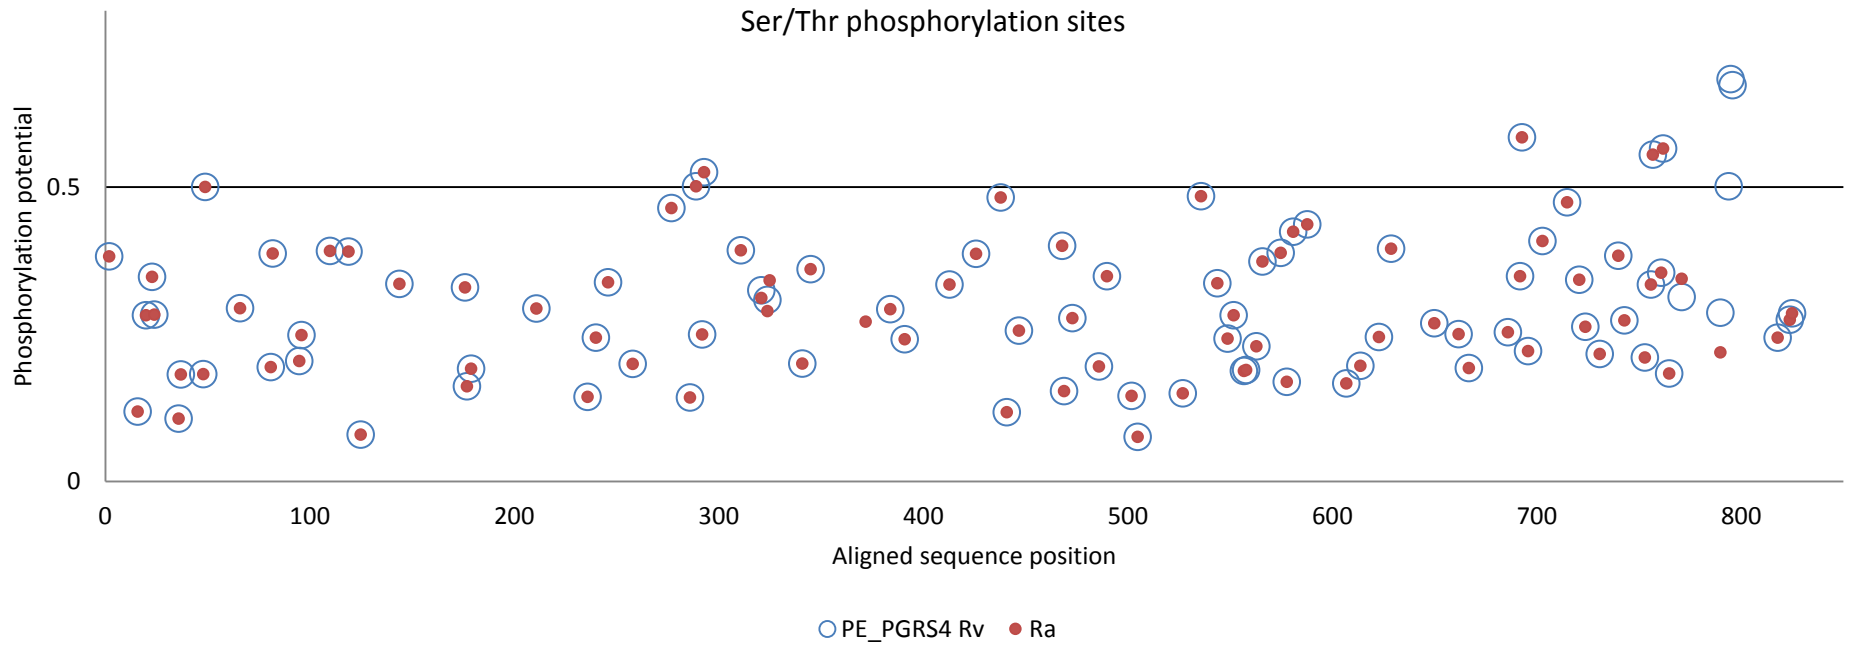

Figure S2-N

MRA\_0755  
Rv0747

1=====224GEG228=====294RSVGDG301=====801  
1=====224RER228=====294KSVGD~~S~~301=====801  
\*\*\*\*\* \* \*\*\*\*\*:\*\*\*\*.\*\*\*\*\*

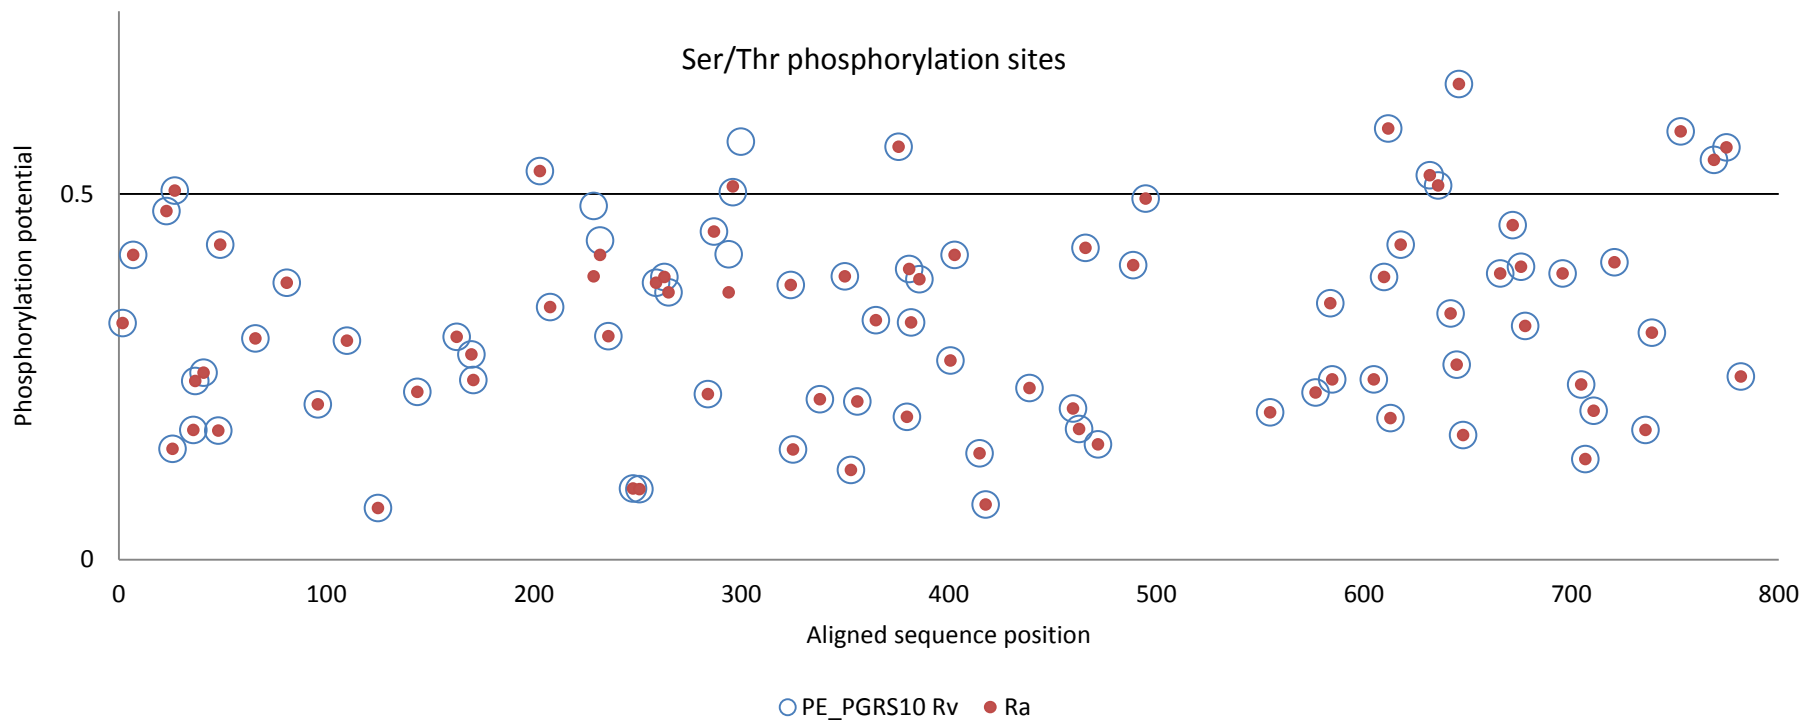

# Figure S2-O

```

MRA_3384      1=1518-----
Rv3343c      1=1518GSYNTGIGNSGIASSTGLFNAAGGFNTGVVNAGSYNTGSFNAGQANTGGFNPGSVNTGWLNTGDINTGVANSQDVNTGAFISGNYSSNGAFWRGDYQ
*****

MRA_3384      -----
Rv3343c      GLLGFSTRPAVLPQTPFLDLTLTGGLGSSVVI PAIDI PAIRPEFSANVAIDSFTVP S I P I P Q I D L A A T T V S V G L G P I T V P H L D I P R V P V T L N Y L F G S Q P G G

MRA_3384      -----
Rv3343c      PLKIGPITGLFNTPIGLTPLALSQIVIGASSSQGTITAFLANLPFSTPVVTIDEIPLLASITGHSSEPVDIFPGGLTIPAMNPLSINLSSGGTGAVTIPAIT

MRA_3384      -----
Rv3343c      IGEIPFDLVAHSTLGPVHILIDLPAVPGFGNTTGAPSSGFFNSGAGGVSGFGNVGAMVSGGWNQAPSALLGGGSGVFNAGTLHSGVLFNFGSGMSGLFNFS

MRA_3384      -----
Rv3343c      VLGLGAPALVSGLSVVGQQLSGLLASGTALHQGLVLNFGGLADVGLGNVGLGNVGFDFNLGAGNVGGFNVGGGNI GGNNVGLGNVGVGNFGLGNSGLTPGLM

MRA_3384      -----
Rv3343c      GLGNIGFGNAGSYNFGLANMGVGNIGFANTGSGNFGIGLTGDNLTGFGGFNTGSGNVGLFNSGTGNVGFNFNSGTGNWGVFNS2095=====2523
*****
  
```

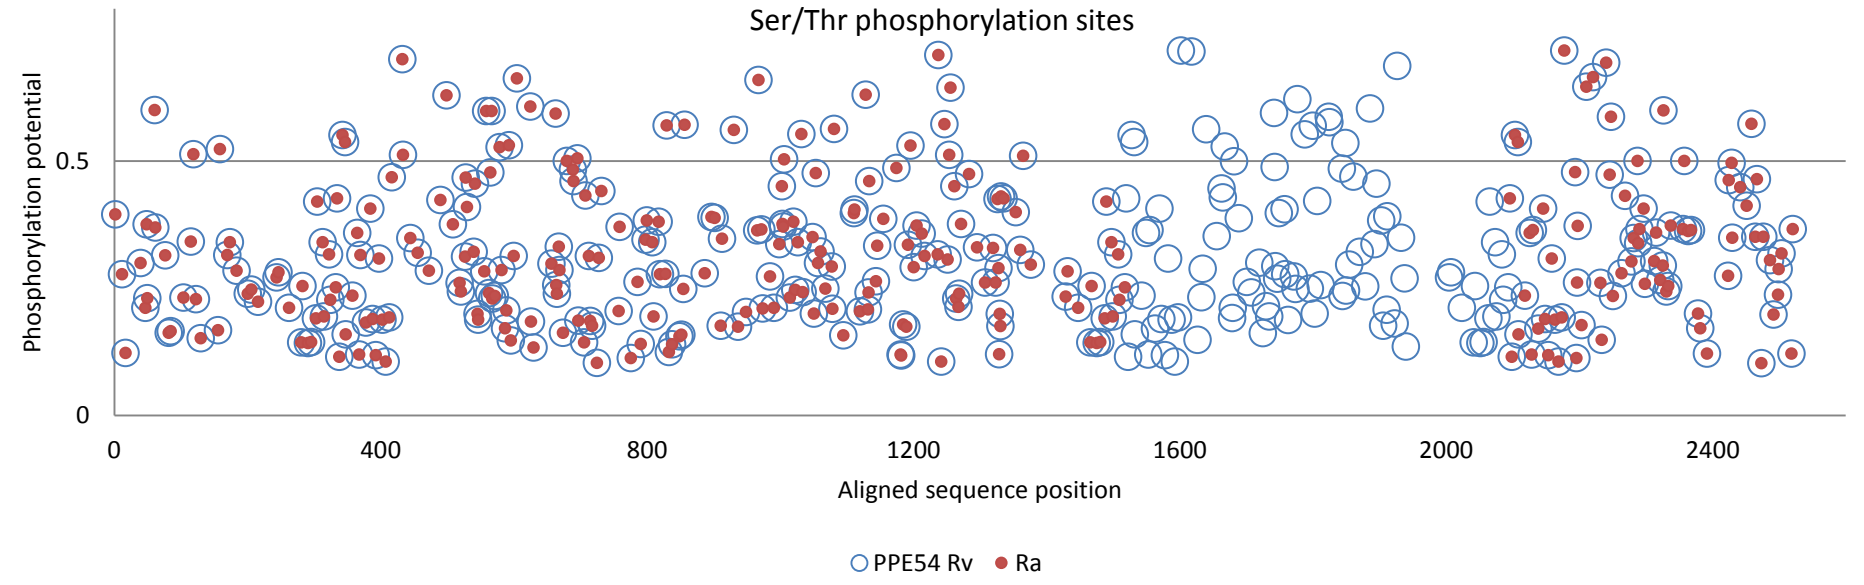

Figure S2-P

MRA\_0395 1=118SLVK123=137AQYGEMWAQDIVAMEGYAGASAAASQLPPFTPPPATTSGAGSLSDAAATAAQAVVPAAAAATDVSLLP TLQ  
 Rv0388c 1=118SLVQ123=137THYGEMWAHDILAMDGYAGASGAASQLRR---SPAT-----  
 \*\*\*\*\*:\*\*\*\*\*:\*\*\*\*\*:\*\*\*:\*\*\*:\*\*\*\*\*.\*\*\*\*\* .\*\*\*

MRA\_0395 SFLPPPFDAIPNPIEDLDVLVAAA VAVAAGSLGVSAAQLGEIYRHDVVDEAQKAPHCPAESDQTPAGAAGDGD LPEVGGRRVTSPPQ  
 Rv0388c -----GDHQ-----RG-----  
 .\*: \*

MRA\_0395 PPVAAL TGYSANIGGLSVP HSWNLPPAVRQVAAMFPGATPMYMTGSSDGSYAGLAAAGLAGTGLAGLAARGGSAPTPAAAA PAGA  
 Rv0388c -----

MRA\_0395 GGAGPAATRPA AQQTPAVPAAAAGSAIPGLPPGLPPGVVANLAATLAAIPGATIIVVPPSPNANQ  
 Rv0388c -----RVAE  
 .. :

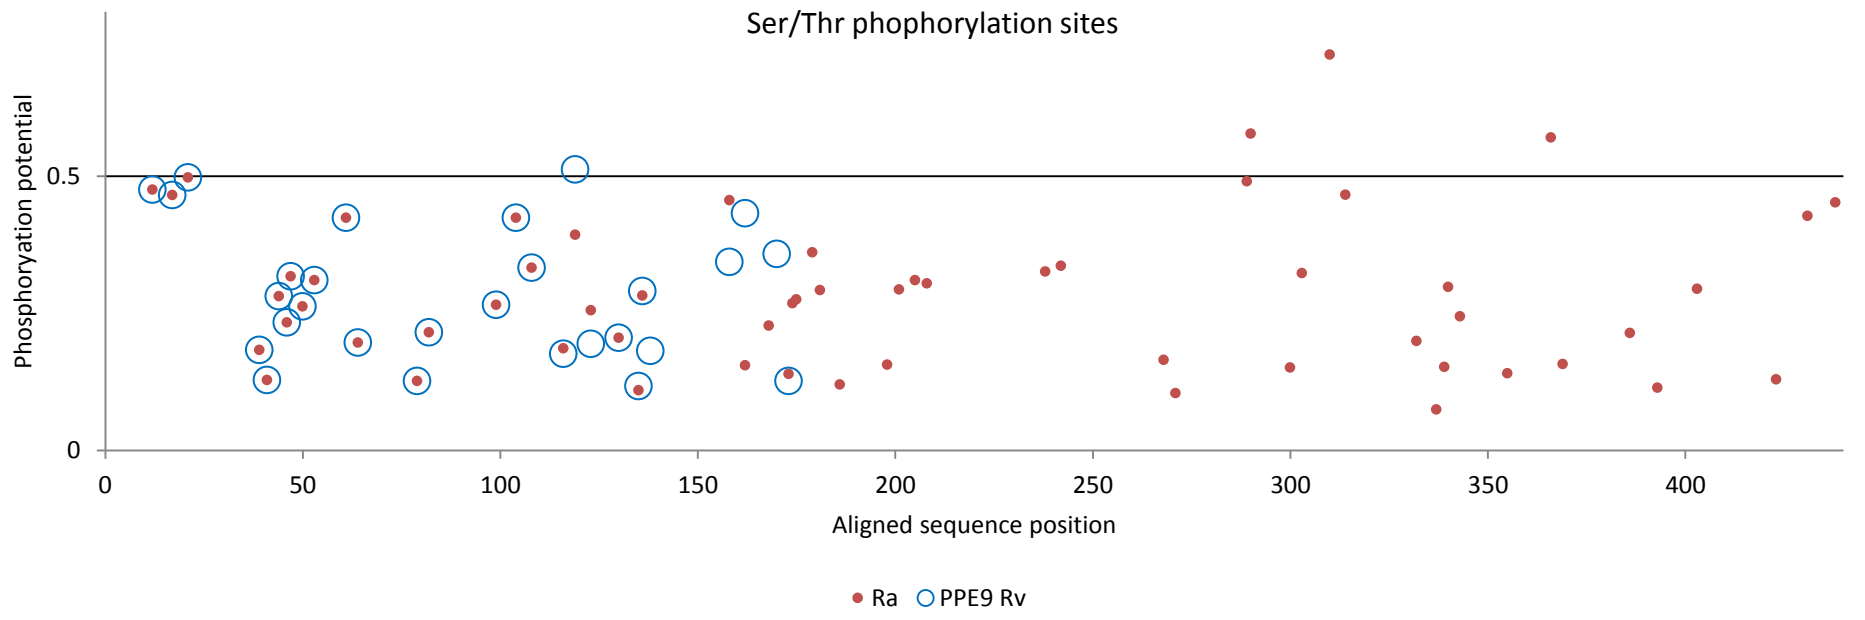

Figure S2-Q

MRA\_0885  
Rv0878c

1=====435PKK**S**REQRVREN**L**  
1=====435QKK-----VGN**S**G  
\*\*\*\*\* \*\* \* :.

Ser/Thr phosphorylation sites

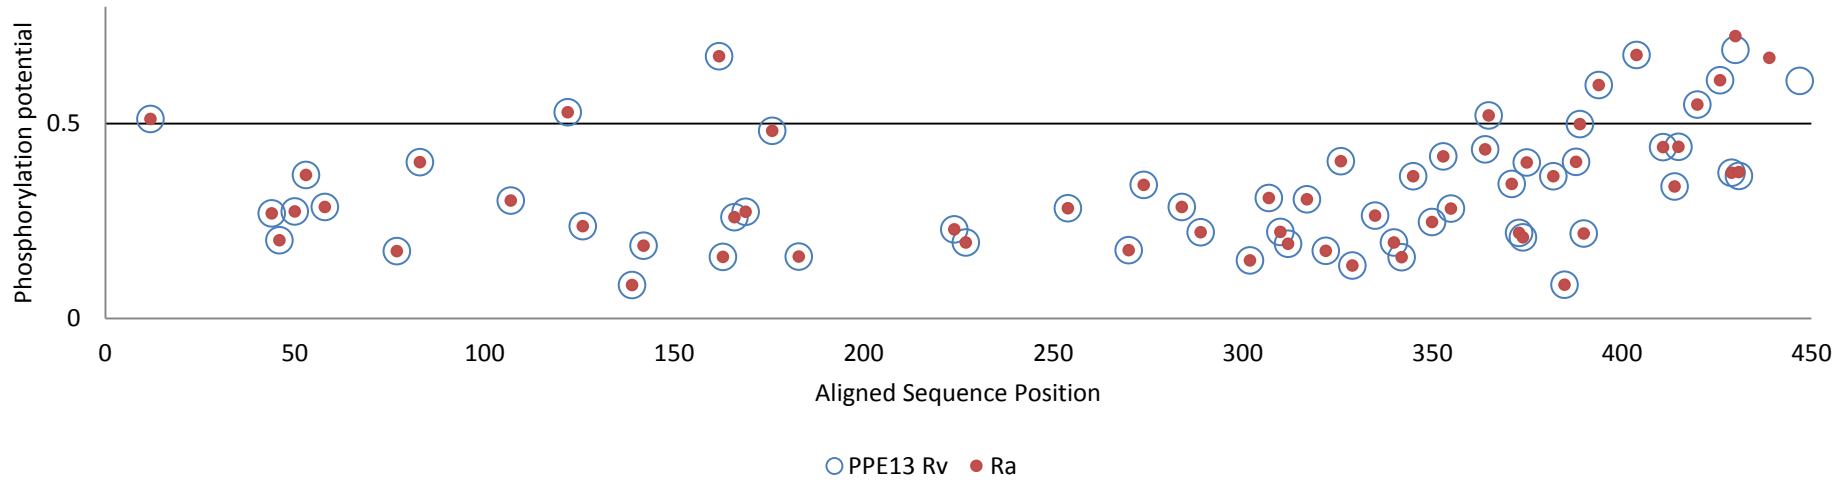

Figure S2-R

MRA\_1205A  
Rv1196

1=307TWVGRPR**S**VRCRC-----RRPGPRPTRQ**S**PRRRGRCR  
 1=307N-LGRAASVGS**L**SVPQAWAAANQAVTPAARALPLTSLTSA AERGPQMLGGLPVGQMGARAGGGL**S**GVLRVPPRPYVM-PH-SPAAG  
 \*\*\*\*\*. :\*\*. \*\* . . . \* \*\* \*

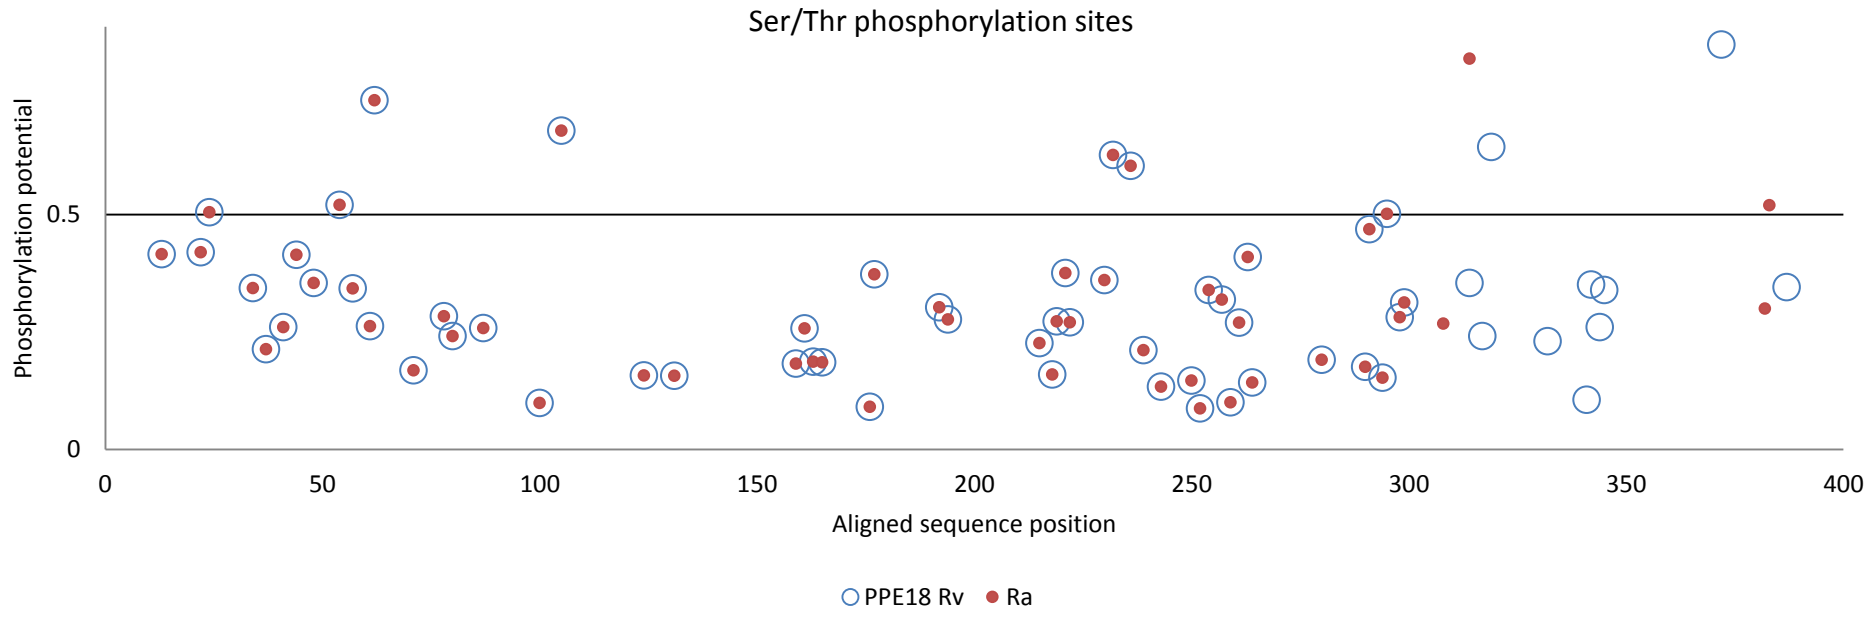

# Figure S2-S

```

MRA_3635      1=162TADP-----VVPA-----
Rv3595c      1=162NGGSGGAGGAGAAGGSGGQGGLLYGNGGAGGNGGAATIPGGNGGAGGAGGNAWLFGNGGAGGLGAAGAAGAAGVNPLTVPAGQGSMDN
*****.....

MRA_3635      --EPVRPAGPADKAGCCTATA-----
Rv3595c      NGEPPGPGQPGTEFGQTGGTGGTGGTGLSVGGTGGTGGTGGAGGSGGRGGLLVGDGGAGGIGGTGGEGGIGARGGTGGQGGMGGAGQPGV
** * . * . : *  .*.

MRA_3635      -----ARAATAGRRLSPAATAAPVVPAATRGYSATVGPGG-SARPARRVPPGSTP
Rv3595c      GGDAGDGGNGGIGGDGGAGGDGGAGGAGGAGGLFGVSGSSGLGGAAGSGGNGGGGGGEPGVAGSPGVGPAGRGGDGNLQFQFPEGAPGQPGQPGQPG
.....* .*.:.*.***. ....* *..*:. **..

```

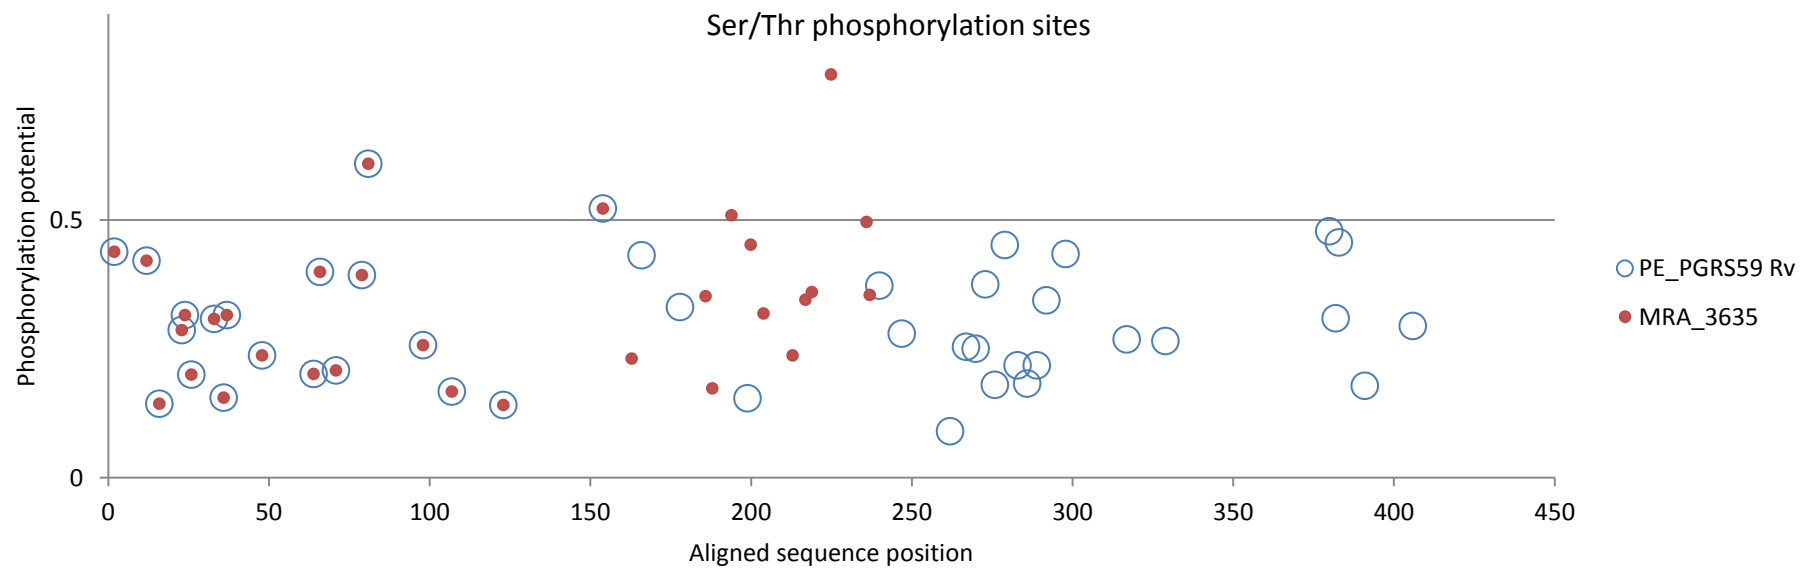

# Figure S2-T

```

MRA_3634 -----MNRADPASQAPSSGKPVAP-----
Rv3595c  MSFVIAVPEFLSAAATDLANLGSTISAANAAASIPPTGVLAAAGADDVSAAI AALFGAHAQAYQTI SAQAATFHAQFVQTLSAGAGAYANAE AANV
           :. *:.*: . *::*  .*

MRA_3634 -----VALAVLACPLAGPA-GPAAPGGPAGPAALAVGVGSWSSATA--AQVASGAQGAKAASAPGAAPAVRAEWAAPGNQA-----
Rv3595c  QQSLLNAINAPTQALLGRPLIGDGADGTAPQNGGAGGLLYGNGGNGAAGV NAGIAGGSGGAAGLIGNGGSGGAGGAGAAGGSGGQGGLLYGNGG
           : *:. * . ** * . . :***  .*...*  * * . *:.  * :*:.*: ** . . *:. . . ** * . .

MRA_3634 -----LGVTLVTGVTAGSAVTAAP---
Rv3595c  AGGNGGAATIPGGNGGAGGAGGNAWLFGNGGAGGLGAAGAAGAAGVNPLTVPAGQGS MGNNGEPGGPGQP GTEFGQTGGTGGTGGTGLSVGGTGG
                                           :* *  ** *.*:..:..

MRA_3634 -----AETAARAARAARAACSASPVAPGWAVPPVAGVMAGAV-----VSPVWPAP
Rv3595c  TGGTGGTGGAGGSGGRGGLLVGDGGAGGIGGTGGEGGIGARGGTGGQGMGGAGQPGVGGDAGDGGNGGIGGDGGAGGDGGAGGAGGAGGLFGVVS
           . *..... **.. ...  * . * *.*  ...  .. :: ..

MRA_3634 RALGLRAVAATATSASS----ALKVHP-SPASRASPVDIVAAGPSA-PRRLLEQLPSVTGPVEALARVEFCGQGVDLIAELG
Rv3595c  GSSGLGGAAGSGGNGGGGGGEPGVAGSPGVGPAGRGGDGNLQQFGPEGAPGQP-----GQPGQP
           : ** ..*:.: . . . . . . :  * ..**.*.. ::  **.. * :  . .: *
  
```

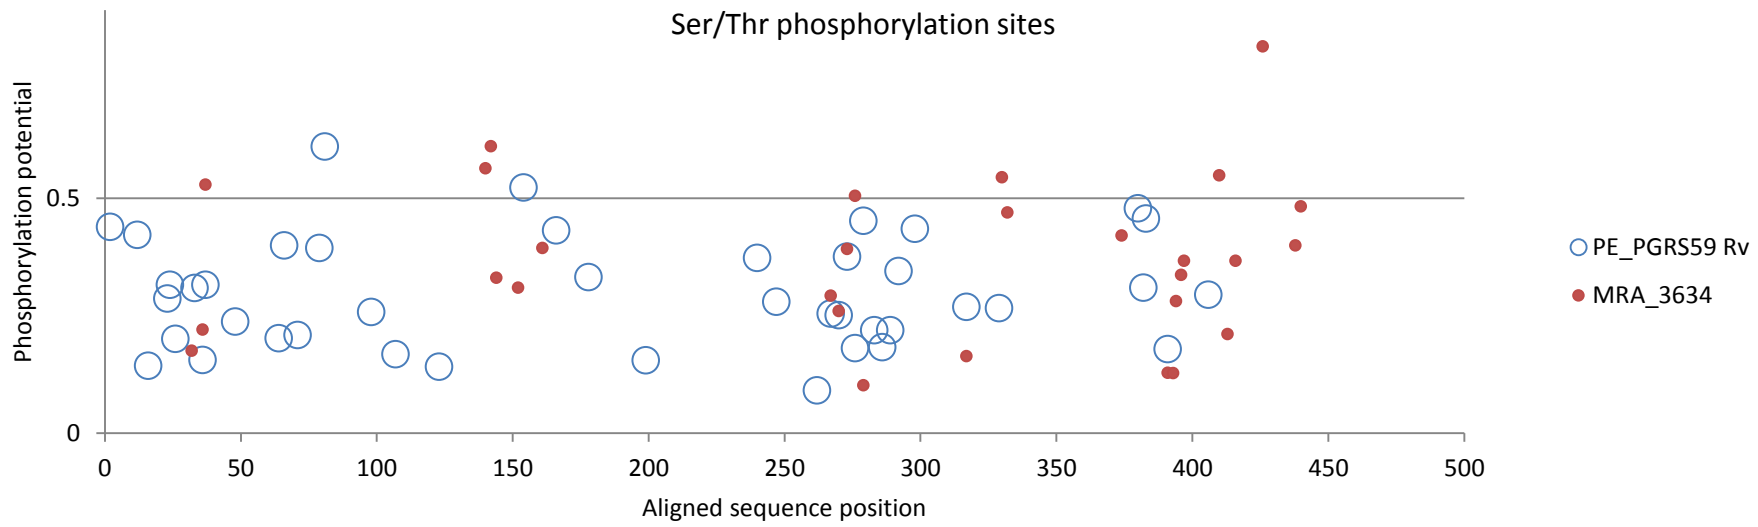



Figure S2-U

MRA\_0767  
Rv0757

1==200HVWRYDFGGDVNVVESYVLYLRRKIDTGEKRLHHTLRGVGYVLREPR  
1==200HVWRYDFGGDVNVVESYVSYLRRKIDTGEKRLHHTLRGVGYVLREPR  
\*\*\*\*\*

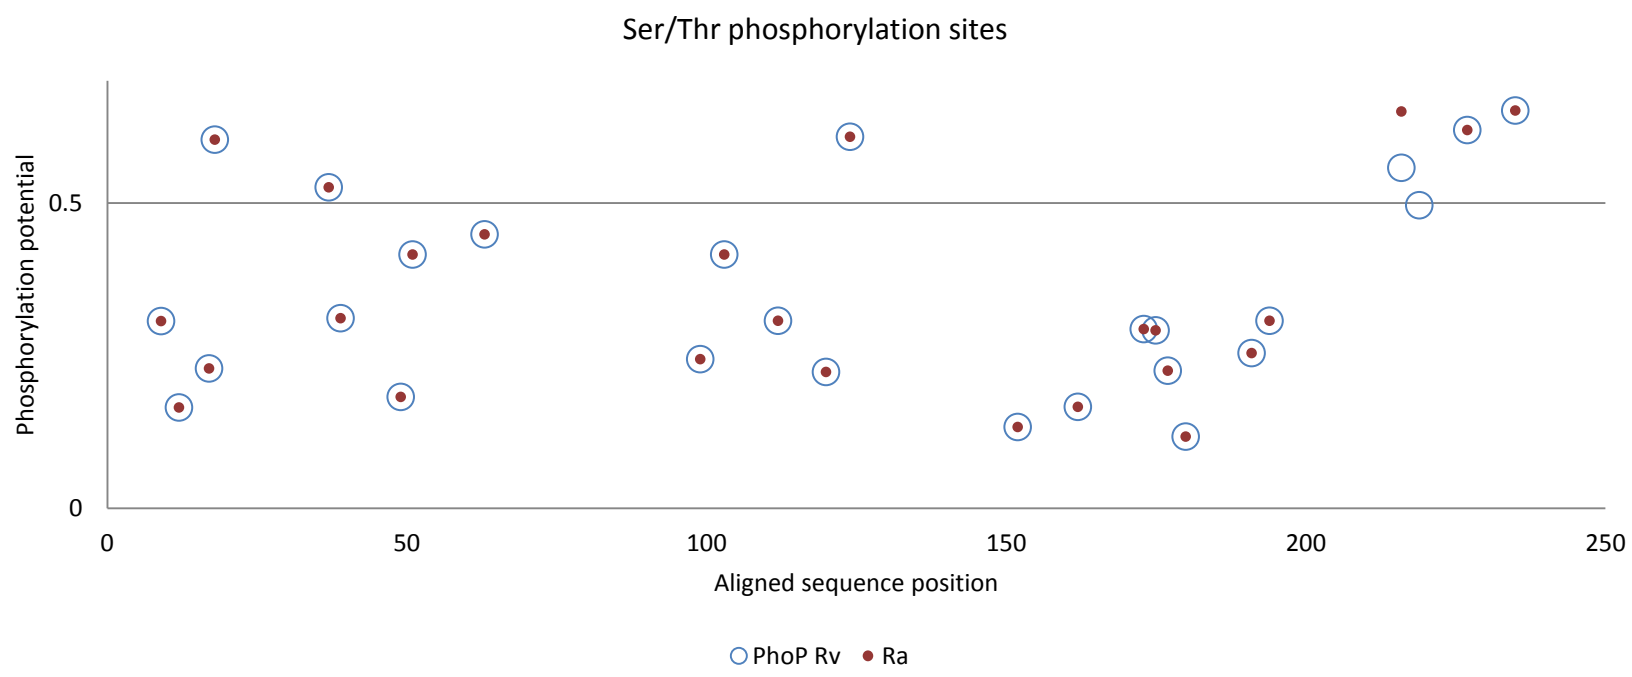

Figure S2-V

MRA\_3950  
Rv3911

1====159ARMLGV AEGTVK SRC-----ARARARLARLLGYLNTGVNIRR  
 1====159RPDAGRGRGRGHRQEPLRPGAGPPSAAAGLSQHRGEHPALTPLPVRRSIDPRARRYPTSGYCHRA  
 \*\*\*\*\* \* ..\* :.

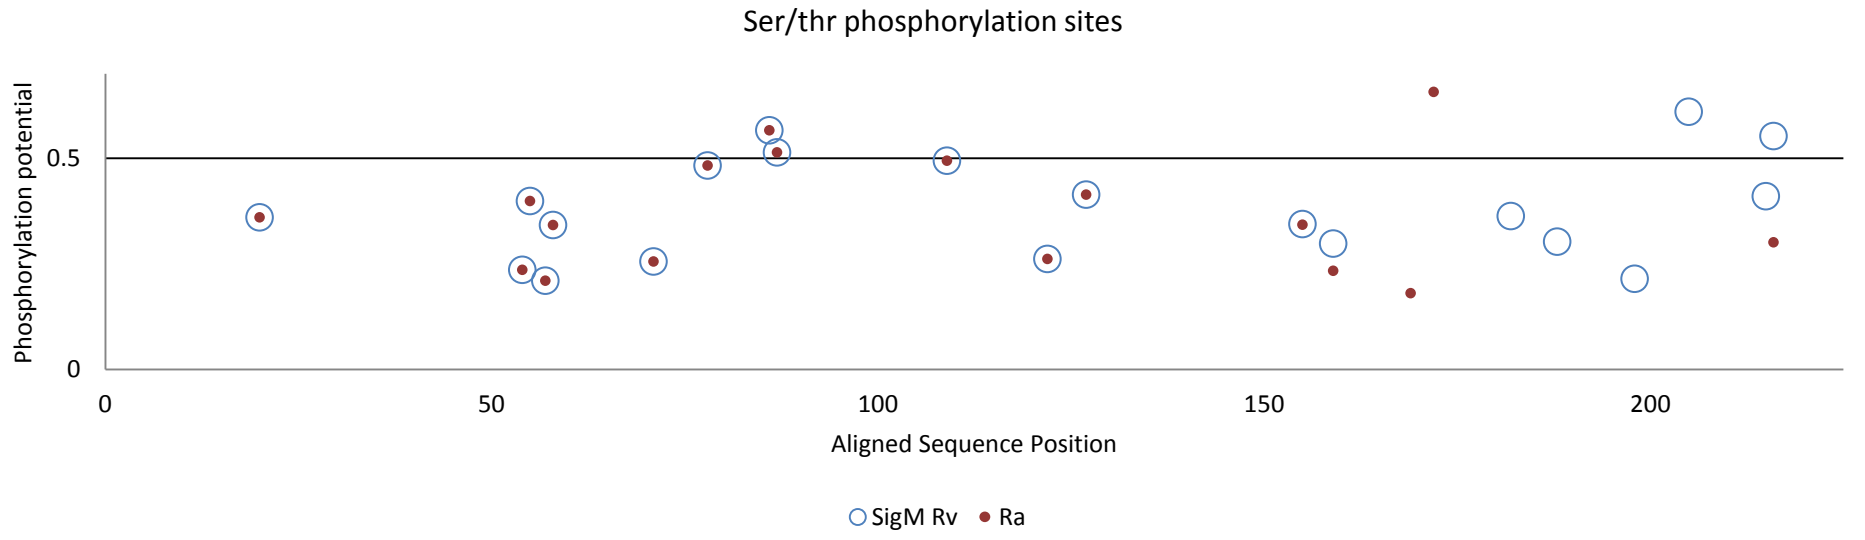

Figure S2-W

MRA\_1156  
RV1146

MFSAVTVALSMSATALFPMYFLKSFAYAGV 31=====499  
-----M 02=====470  
: \*\*\*\*\*

Ser/thr phosphorylation sites

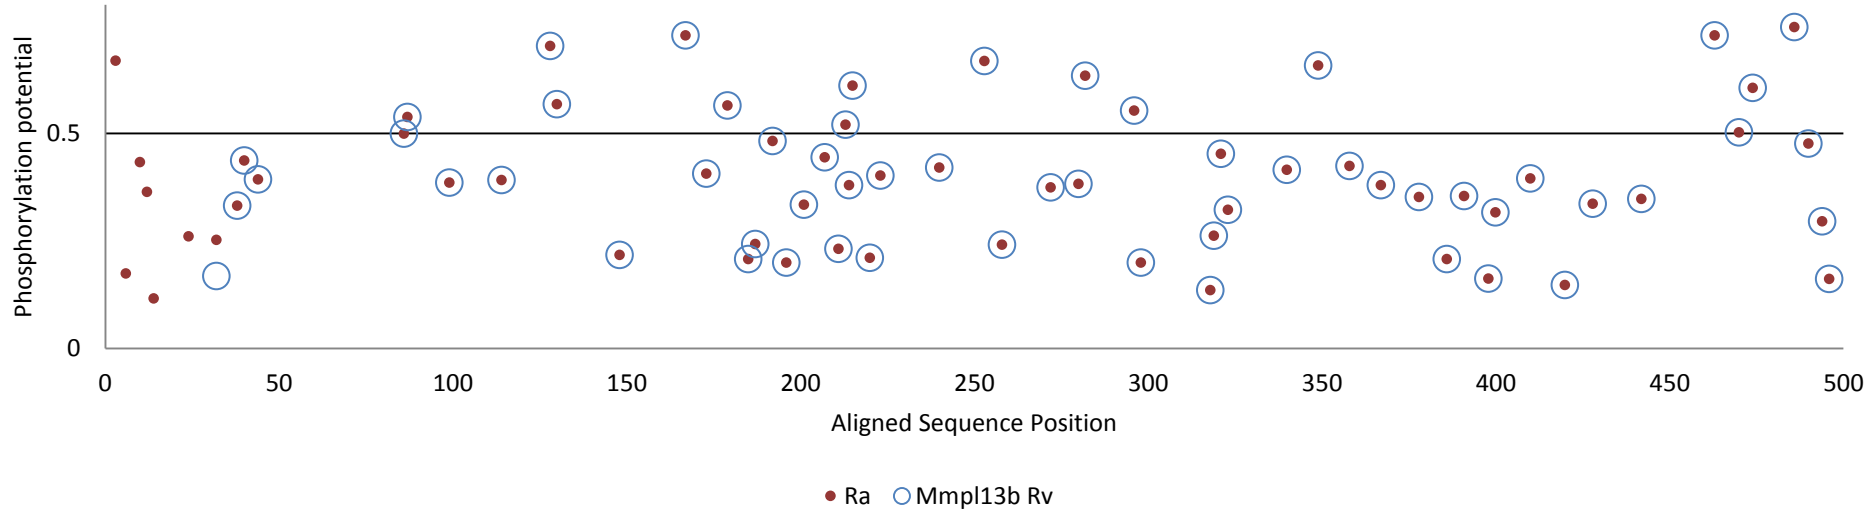

Supplement: supp_gks465_nar-00797-n-2012-File009.pdf [file supp_gks465_nar-00797-n-2012-File009.pdf]
